# Supplementary material for: FOXA and master transcription factors recruit Mediator and Cohesin to the core transcriptional regulatory circuitry of cancer cells
Source: PubMed Central journal article supplement (PMC5064413; doi:10.1038/srep34962), 2016-10-14
Supplement: srep34962-s1.pdf [file srep34962-s1.pdf]

## **Supplementary Information**

### **FOXA and master transcription factors recruit Mediator and Cohesin to the core transcriptional regulatory circuitry of cancer cells**

Michèle Fournier, Gaëlle Bourriquen, Fabien C. Lamaze, Maxime C. Côté, Éric Fournier, Charles Joly-Beauparlant, Vicky Caron, Stéphane Gobeil, Arnaud Droit and Steve Bilodeau

## **CONTENTS**

### **Supplementary Tables**

### **Supplementary Figures**

### **Supplementary Data Files**

### **Supplementary Experimental Procedures**

#### **Cell Culture Conditions**

#### **Chromatin Immunoprecipitation**

*Antibodies*

*Immunoprecipitation*

*ChIP-qPCR (Fig. 5 and Supplementary Figs S2 and S4)*

*Library Preparation and Sequencing*

#### **Bioinformatics and Analytical Methods**

*Short-Read pipeline processes*

*Data mining and parsing of the metadata*

*Gene annotation*

*Merging of ChIP-seq biological replicates*

*PCA analyses (Fig. 1a)*

*Browser tracks (Figs 1b and 3c)*

*Overlaps with chromatin states (Fig. 1c,d)*

*Clustering of MED1, SMC1A (no CTCF), SMC1A (with CTCF) and NIPBL data (Fig. 1e)*

*KEGG pathways (Fig. 2a)*

*Overlaps with transcription factors (Fig. 3a)*

*DNA motif searches (Fig. 3a)*

#### **Lentiviral shRNAs**

**Cell proliferation assays (Figs 2b and 4a)**

**Soft-agar colony formation assays (Figs 2c and 4b)**

### **Supplementary References**

### **Supplementary Tables**

**Supplementary Table S1. KEGG pathways enriched with genes occupied by MED1, SMC1A and NIPBL in MCF7, HEPG2 and A549 cells.**

**Supplementary Table S2. List of ChIP-Seq datasets used in the study.**

**Supplementary Table S3. List of shRNA plasmids and sequences used in the study**

### **Supplementary Figures**

**Supplementary Fig. S1: shRNA targeting of MED1, SMC1A and NIPBL leads to decreased protein levels.** Western blot validations of MED1, SMC1A and NIPBL depletions in MCF7, HEPG2 and A549 cells for the proliferation and colony formation assays used in **Fig. 2**. Vinculin was used as loading control to quantify the relative protein levels indicated below each panel. Two shRNAs were used per target and both were efficient at reducing protein levels compared to control shRNAs.

**Supplementary Fig. S2: Validation of the core transcriptional regulatory circuitry in cancer cells. (a)** Core transcriptional regulatory circuitry of MCF7, HEPG2 and A549 cells. The box represents the transcription factor gene loci while the oval represents the protein. Each line represents the interaction of a transcription factor with the indicated gene loci (-10kb to the end of the gene). **(b)** ChIP-qPCR validating the transcription factors occupancy at the core transcriptional regulatory circuitry genes. Regions with the most ChIP-Seq signal for each transcription factor were used for quantification. The bar graphs display enrichment fold calculated relative to control regions without ChIP-Seq signal and the error bars show the standard error of the mean for technical qPCR triplicates. **(c)** Gene expression changes following estrogen (E2, 100 nM) stimulation in MCF7. Fold changes were calculated relative to GAPDH at different time points. Error bars show the standard error of the mean for technical qPCR triplicates.

**Supplementary Fig. S3: shRNA targeting of the identified transcription factors leads to decreased protein levels. (a)** Western blot validations of the depletions of ER $\alpha$  and FOXA1 in MCF7 cells, HNF4A and FOXA2 in HEPG2 cells and FOSL2 and FOXA2 in A549 cells for the proliferation and colony formation assays used in **Fig. 4**. GAPDH or vinculin were used as loading control to quantify the relative protein levels indicated below each panel. Two shRNAs were used per target and both were efficient at reducing protein

levels compared to control shRNAs. It is to be noted that the shFOSL2-2 did not reduce the level of the all FOSL2 isoforms and was not used in **Fig. 4**.

**Supplementary Fig. S4: Validation of the recruitment of Cohesin and Mediator by FOXA and master transcription factors.** **(a)** Levels of MED1 and SMC1A are not affected by decreased expression of ERa and FOXA1 in MCF7 cells. Protein levels evaluated by Western blot for MED1 and SMC1A following shRNA targeting ERa and FOXA1 in MCF7 cells. Vinculin was used as loading control to quantify the relative protein levels indicated below each panel. Loss of ERa and FOXA1 do not significantly affect expression of MED1 and SMC1A. For **Fig. 5**, shESR1-1 and shFOXA1-2 were used since they were the most efficient. **(b)** Depletion of either the master transcription factor ERa or the pioneer transcription factor FOXA1 in MCF7 cells decreases MED1 and SMC1 recruitment at regions with low levels of ERa and FOXA1. Enrichment fold were calculated relative to control regions without MED1 or SMC1 signal. The bar graphs display the enrichment fold and error bars show the standard error of the mean for technical qPCR triplicates. **(c)** Cohesin subunits SMC3 and SA2 are recruited to the TSS of *GREB1* and *TFF1*. Enrichment fold measured by ChIP-qPCR were calculated relative to control regions without ChIP-Seq signal for Cohesin subunits. **(d)** Depletion of FOXA1 in MCF7 cells decreases SMC1A and SMC3 recruitment at the TSS of *GREB1* and *TFF1* suggesting the presence of the Cohesin complex.

### **Supplementary Data Files**

**Supplementary Data File 1** is a file containing all the ChIP-Seq enriched regions used in the study. The ZIP archive is accessible using the following URL: [https://datahub-kazb7g4u.udes.genap.ca/Scientific\\_Reports/Supplementary\\_Data\\_Files/](https://datahub-kazb7g4u.udes.genap.ca/Scientific_Reports/Supplementary_Data_Files/). (ZIP archive containing BED files; Size: 25.8 MB)

**Supplementary Data File 2** is a file containing all the browser tracks used in the study. The ZIP file is accessible using the following URL: [https://datahub-kazb7g4u.udes.genap.ca/Scientific\\_Reports/Supplementary\\_Data\\_Files/](https://datahub-kazb7g4u.udes.genap.ca/Scientific_Reports/Supplementary_Data_Files/). (ZIP archive containing bigWig files; Size: 7.74 GB)

## **Supplementary Experimental Procedures**

### **Cell Culture Conditions**

MCF7 (ATCC, HTB-22), as well as HEPG2 (ATCC, HB-8065) were grown in DMEM (Gibco, 11965-092), while A549 (ATCC, CCL-185) were grown in F12K medium (Gibco, 21127022) as recommended by the supplier. All cell mediums were supplemented with 10% fetal bovine serum (Invitrogen, qualified 12483020), 100  $\mu$ M MEM nonessential amino acids (Cellgro, 25-0250), 2 mM L-glutamine (Gibco, 25030-081), 100 U/ml penicillin, 100  $\mu$ g/ml streptomycin (Gibco, 15170-063). For ChIP experiments, MCF7 were kept in DMEM w/o phenol-red (Gibco, 31053-028) supplemented with 5% of Charcoal/Dextran treated FBS (Hyclone, AVH78911), 100  $\mu$ M MEM nonessential amino acids (Cellgro, 25-0250) and 2 mM L-glutamine (Gibco, 25030-081) for 3 days prior to 100nM of Beta-Estradiol (SIGMA, E8875) for two hours.

### **Chromatin Immunoprecipitation**

#### *Antibodies*

For MED1 (CRSP1/TRAP220) occupied genomic regions, we performed the ChIP-Seq experiments using the Bethyl Laboratories (A300-793A) antibody. The affinity purified antibody was raised in rabbit against an epitope corresponding to amino acids 1523-1281 mapping at the C-terminus of human MED1. Specificity of the antibody for ChIP-Seq experiments was validated previously <sup>1</sup>.

For SMC1A occupied genomic regions, we performed the ChIP-Seq experiments using the Bethyl Laboratories (A300-055A) affinity purified rabbit polyclonal antibody. The epitope recognized by A300-055A maps to a region between residue 1175 and the C-terminus of human SMC1A. Specificity of the antibody for ChIP-Seq experiments was validated previously <sup>1</sup>.

For NIPBL occupied genomic regions, we performed the ChIP-Seq experiments using the Bethyl Laboratories (A301-779A) affinity purified rabbit polyclonal antibody. The affinity purified antibody was raised in rabbit to a region between amino acid residues 1025 and 1075 of human NIPBL. Specificity of the antibody for ChIP-Seq experiments was validated previously <sup>1</sup>.

For ERa occupied genomic regions, we performed the ChIP-Seq experiments using the Santa Cruz (sc-543x) affinity purified rabbit polyclonal antibody. The affinity purified antibody was raised in rabbit to a region between amino acid residues 1025 and 1075 of human ERa. Specificity of the antibody for ChIP-Seq experiments was validated previously by ENCODE project consortium ([https://genome.ucsc.edu/ENCODE/validation/antibodies/human\\_ERalpha\\_a\\_validation\\_Myers.pdf](https://genome.ucsc.edu/ENCODE/validation/antibodies/human_ERalpha_a_validation_Myers.pdf)).

### *Immunoprecipitation*

ChIP (ChIP-qPCR) and ChIP coupled with massively parallel sequencing (ChIP-seq) were performed as previously described <sup>1,2</sup>. Briefly, cells were crosslinked with 1% formaldehyde in culture medium for 10 minutes at room temperature. Cells were then lysed in 10 ml lysis buffer (0.1%SDS, 1% Triton X-100, 2mM EDTA, 20mM Tris-HCl ph 8.0 and 150 mM NaCl) and chromatin was sheared to 200-600 bp fragments using a Bioruptor Sonicator (Diagenode). Chromatin extract from  $5 \times 10^7$  cells was incubated overnight at 4°C with 100 ul of Dynabeads Protein G magnetic beads (Life Technologies, 10004D) previously incubated with 10 ug of selected antibodies (NIPBL (Bethyl, A301-779A), MED1 (Bethyl, A300-793A), SMC1A (Bethyl, A300-055A), ERa (Santa Cruz, sc543X), SMC3 (Bethyl, A300-158A) and SA2 (Bethyl, A300-060A)).

### *ChIP-qPCR (Fig. 5 and Supplementary Figs S2 and S4)*

For single gene analysis, primers were designed in the predicted enhancers and promoters regions of *TFF1* and *GREB1* genes. For the *TFF1* locus, primers GAGATGATGCCACCGTACAC and CCCTCACTCACTTTGAAGCA were used for E1, ATCCAGTCCAGGAAGGAGGT and GTCAAGAGAGGAGGCTGTGG for E2 and CCGAGTCAGGGATGAGAGG and GGCCTCCTTAGGCAAATGTT for the TSS. For the *GREB1* locus, primers GAGCTGACCTTGTGGTAGGC and CAGGGGCTGACAACTGAAAT were used for E1, GGGATATGGCTTGTCCATTGT and CATGACACCAGGACCGTAAAG for E2 and ACCCAGCAAACACTTCAGG and ATTCAGCAGTAGCCCTTCCA for the TSS. Two negative control regions (ATGTCAGGCCCATGAACGAT & GCATTCATGGAGTCCAGGCTTT and AGGACCTGCAGCAAACAGAA & TGTCTACATGGGCTAGTGTGCT) were used to calculate fold enrichments.

For supplementary Figs S2 and S4, the following primers were used:

| <b>ChIP-qPCR</b>          |                           |                           |
|---------------------------|---------------------------|---------------------------|
| <b>Target</b>             | <b>Forward</b>            | <b>Reverse</b>            |
| <b>MCF7</b>               |                           |                           |
| <i>ESR1</i>               | CTGCAGTAGGCACTCAGTAAAT    | TCAAACCTAACCTGAAACTCGGT   |
| <i>FOSL2</i>              | GCAGGCACTGGGAACAG         | CACAGAGGGTCTCCCTATCTC     |
| <i>FOXA1</i>              | CACAGCACCGGTTTATATCTTTATG | CTGCTCTCAGTTTCTTCCTCTT    |
| <i>JUND</i>               | CGGTAAACGCCACAACAG        | ATGACGTCAACCCACAAGG       |
| Low ERα                   | GCAACACCAAACACTGCTATC     | TGTTTCTCGAGGAGTATATCTGAAC |
| Low FOXA1                 | GGTAGGATACCACAGGCTGATA    | AATGCTGCGGAACGAGTC        |
| <b>HEPG2</b>              |                           |                           |
| <i>CEBPB</i> (ChIP FOXA)  | CTCTCTGCTTCTCCCTCTGC      | TAAGCGATTACTCAGGGCCC      |
| <i>CEBPB</i> (ChIP HNF4A) | CTGGGCCAGTGTTTTATCCC      | GTTATCTGCTGAGCTGGGGT      |
| <i>FOXA1</i> (ChIP FOXA)  | GGTTTCCGAGGAAGGGATTA      | CCGGGACCTAAAAGTCAACA      |
| <i>FOXA2</i> (ChIP FOXA)  | CCCCTCCCTGTTACAGTTCA      | GGTGTCTGAGGAGTCGGAGA      |
| <i>FOXA2</i> (ChIP HNF4A) | CTATTTTGCTCCTGGGTGGA      | AAAGTCCGCTCCTTGGAAGT      |
| <i>HNF4A</i>              | TTCTCCTGGCTCTGACACTG      | CAACAGTCTGCTTGTTCCCC      |
| <b>A549</b>               |                           |                           |
| <i>ATF3</i>               | TAGCATTACGTCAGCCTGGG      | GCGTTGCATCACCCCTTTTA      |
| <i>FOSL2</i> (ChIP FOSL2) | CAAGGTGGAGTCTGGGGTTG      | TCTGCCCGAGATGAGTCACT      |
| <i>FOSL2</i> (ChIP FOXA)  | AGTTTTCTGAGTTTTGCTGCTG    | TTTACGCGCCTCTCCCAG        |
| <i>FOXA1</i> (ChIP FOSL2) | AGAGCTTCAGACTAGAAAAGGGA   | GCCTAACGTCACTTGGCTC       |
| <i>FOXA1</i> (ChIP FOXA)  | CAAGCCCACGCCTTTATATT      | GACCTCGGAAGGACATCAAA      |
| <i>FOXA2</i> (ChIP FOSL2) | ACACCACCTTTTCCTTGCAA      | TTGGGGATAGGGAAGCAGAG      |
| <i>FOXA2</i> (ChIP FOXA)  | CTTTTCAGTCACAACCGAGGT     | TCTTCTCTCCTCACCCCTCC      |
| <i>JUND</i>               | AGTTGTTGGGGAGAGAGGAC      | TTTACTGCGACTTCCCTCCC      |
| <b>RTqPCR</b>             |                           |                           |
| <i>ESR1</i>               | AGCTCCTCCTCATCCTCC        | ATAGAGGGGCACCACGTTCT      |
| <i>FOXA1</i>              | GTGAAGATGGAAGGGCATGA      | CCAGGCCTGAGTTCATGTT       |
| <i>JUND</i>               | ACGAGCTCACAGTTCCTCTA      | GCTGGTTCTGCTTGTGTAATC     |
| <i>FOSL2</i>              | CCTGGCGTGATCAAGACCAT      | CGACGCTTCTCCTCCTCTTC      |

### *Library Preparation and Sequencing*

ChIP-seq libraries and DNA sequencing were performed by the McGill University and Génome Québec Innovation Centre (MUGQIC). Briefly, ChIP libraries were prepared with the TruSeq DNA sample prep kit using indexing adapters according to the manufacturer's recommendations (Illumina). The starting amount of ChIP DNA used for library preparation ranged from 2.5 ng to 10.5 ng per sample. Library quality and average fragment size was confirmed with Bioanalyzer DNA analysis chips (25-1000 bp, Agilent). TruSeq libraries were multiplexed on the Illumina HiSeq2000. We used single-end reads of 50 bp. Two biological replicates were performed for each target.

### **Bioinformatics and Analytical Methods**

All the ChIP-Seq datasets used in the study (**Supplementary Table S2**) were analyzed with ChIP-Seq pipeline developed at the MUGQIC (version 2.1.0) which is briefly summarized below:

#### *Short-Read pipeline processes*

All samples were processed using Trimmomatic 0.33<sup>3</sup> with the following parameters: LEADING=30, TRAILING=30, SLIDINGWINDOW=4:30, MINLEN=30. ChIP-seq reads were mapped against the hg19 build of the human reference genome using BWA 0.7.12<sup>4</sup> with default parameters. MACS2 2.1.0<sup>5</sup> with default parameters was used for peak calling. All replicates (two replicates for our ChIP-Seq experiments and up to eight for ENCODE datasets) were processed separately until this step.

#### *Data mining and parsing of the metadata*

##### *ENCODEExplorer*

(<https://www.bioconductor.org/packages/release/bioc/html/ENCODEExplorer.html>) was used to parse the metadata and retrieve the Fastq files from the ENCODE consortium. ChIPseeker<sup>6</sup> was used for data mining of data deposited in the GEO database.

##### *Gene annotation*

All peak regions defined by MACS2 were annotated using the UCSC database R package TxDb.Hsapiens.UCSC.hg19.knownGene

(<http://bioconductor.org/packages/release/data/annotation/html/TxDb.Hsapiens.UCSC.hg19.knownGene.html>) and CHIPseeker.

*Merging of ChIP-seq biological replicates* ConsensusSeeker (<https://www.bioconductor.org/packages/devel/bioc/html/consensusSeeker.html>) was used to merge the narrowPeak files generated by MACS2 for all replicates to find the best consensus at a given genomic regions. The following parameters were used: extendingSize = 200, expandToFitPeakRegion = TRUE, shrinkToFitPeakRegion = TRUE. The extendingSize parameter allows to determine the size of padding on both sides of the position of the peaks median to create the consensus region. The expandToFitPeakRegion parameter allows to extend the consensus regions to include the entire narrow peak regions of all peaks included in the unextended consensus region. shrinkToFitPeakRegion allow to shrink the consensus regions size to fit the narrow peak regions of the peaks when all those regions are smaller than the consensus region. The minimum number of replicates with a significant enriched region (minNbrExp) was set to 2 out of 3 for targets with 3 and more datasets. minNbrExp was set to 2 for targets with 2 biological replicates.

#### *PCA analysis (Fig. 1a)*

A binary matrix encoding the presence or absence of NIPBL, MED1, SMC1A or CTCF at all genomic loci where at least one factor was present was constructed (Rows: loci; Columns: ChIP-Seq targets). Principal component analysis (PCA) was performed using the R package FactoMineR (<http://CRAN.R-project.org/package=FactoMineR>) considering the presence or absence of NIPBL, MED1, SMC1A or CTCF as the variables. Visualization of the variables on the first two components was performed using a “correlation circle plot” with the factoextra R package (<https://github.com/kassambara/factoextra>). For the representation, the correlation/loading values are on the 0 to 1 scale, with a value of 1 meaning 100% correlation/loading with the dimension. The density of loci was calculated as the projection of the loci coordinates onto the first dimension (which discriminated the most the loci with CTCF and without CTCF). The y-axis is scaled to one unit and the x-axis is an arbitrary unit representing the coordinates of the loci on the first dimension. Each group (No signal, SMC1A (no CTCF), and SMC1A (with CTCF)) was assigned a color.



### *Browser tracks (Figs 1b and 3c)*

BigWig files were generated by using Samtools 1.2<sup>4</sup>, bedtools 2.17.0<sup>7</sup> and wigToBigWig (developed by the ENCODE team) with normalized count in millions of reads and a smoothing parameter of 225 bp.

### *Overlaps with chromatin states (Fig. 1c,d)*

The 18 chromatin states for HEPG2 and A549 were retrieved from the consortium Epigenomic Roadmap. The chromatin states were generated with ChromHMM<sup>8,9</sup> with a core set of 6 chromatin marks (H3K4me3, H3K4me1, H3K36me3, H3K27me3, H3K27ac, H3K9me3). Abbreviations: 1\_TssA (Active TSS), 2\_TssFlnk (Flanking TSS), 3\_TssFlnkU (Flanking TSS Upstream), 4\_TssFlnkD (Flanking TSS Downstream), 5\_Tx (Strong transcription), 6\_TxWk (Weak transcription), 7\_EnhG1 (Genic enhancer 1), 8\_EnhG2 (Genic enhancer 2), 9\_EnhA1 (Active Enhancer 1), 10\_EnhA2 (Active Enhancer 2), 11\_EnhWk (Weak Enhancer), 12\_ZNF/Rpts (ZNF genes & repeats), 13\_Het (Heterochromatin), 14\_TssBiv (Bivalent/Poised TSS), 15\_EnhBiv (Bivalent Enhancer), 16\_ReprPC (Repressed PolyComb), 17\_ReprPC (Weak Repressed PolyComb), 18\_Quies (Quiescent/Low).

For MCF7, the same 6 chromatin marks were used (H3K4me3, H3K4me1, H3K36me3, H3K27me3, H3K27ac, H3K9me3) as follow. Regions enriched for H3K27ac and H3K4me3 were considered Active TSS (TssA). Regions enriched with H3K36me3 were considered transcriptionally active regions (Tx). Regions enriched with both H3K27ac and H3K4me1 were considered active enhancers (EnhA). Regions enriched with H3K9me3 were considered as heterochromatin (Het). Regions enriched for H3K4me3 and H3K27me3, but not H3K27ac were considered Bivalent/Poised TSS (TssBiv). Regions enriched for H3K4me1 and H3K27me3, but not H3K27ac were considered Bivalent Enhancers (EnhBiv). Regions enriched for H3K27me3, but not H3K27ac, TssBiv or EnhBiv were considered Repressed PolyComb (ReprPC). Abbreviations: 1\_TssA (Active TSS), 2\_Tx (Strong transcription), 3\_EnhA (Active Enhancer), 4\_Het (Heterochromatin), 5\_TssBiv (Bivalent/Poised TSS), 6\_EnhBiv (Bivalent Enhancer), 7\_ReprPC (Repressed PolyComb).

Once the chromatin states were defined, the ratio of nucleotides from each chromatin state overlapping the consensus peak regions of NIPBL, MED1, SMC1A (with and without

CTCF) was calculated. Additionally, that same ratio was calculated for regions where the consensus peaks of NIPBL, MED1 and SMC1A intersected.

*Clustering of MED1, SMC1A (no CTCF), SMC1A (with CTCF) and NIPBL data (Fig. 1e)*

All MED1, NIPBL, SMC1A (with CTCF) and SMC1A (no CTCF) regions from all cell lines were converted into a binary presence matrix, as in **Fig. 1a**. The overlap in-between all region categories was calculated using the category with the lowest number of regions as the denominator. The resulting matrix was subjected to hierarchical clustering using euclidian distance and Unweighted Pair Group Method with Arithmetic Mean (UPGMA).

*KEGG Pathways (Fig. 2a)*

For each cell line, the intersections of the consensus regions for MED1, NIPBL and SMC1A were computed. The selected regions were then annotated using the TxDb.Hsapiens.UCSC.hg19.knownGene package (<http://bioconductor.org/packages/release/data/annotation/html/TxDb.Hsapiens.UCSC.hg19.knownGene.html>). Comparison to the hypergeometric distribution was used to evaluate enrichment of all KEGG pathways within the set of identified genes. All generated p-values were then subjected to a unified FDR correction.

*Overlaps with transcription factors (Fig. 3a)*

The overlap between the intersection of the MED1, NIPBL, and SMC1A consensus regions and the consensus regions of all available ENCODE factors were computed. The reported pairwise overlap is:

$$\text{Overlap}_{\text{TF}} = \frac{N_{\text{NMS,TF}}}{\min(N_{\text{NMS}}, N_{\text{TF}})}$$

Where  $N_{\text{NMS,TF}}$  is the number of regions where NIPBL, MED1, SMC1A and the ENCODE TF are all present,  $N_{\text{NMS}}$  is the number of regions where NIPBL, MED1, SMC1A are present, and  $N_{\text{TF}}$  is the number of regions where the ENCODE TF is present.

*DNA motif searches (Fig. 3a)*

The regions bearing NIPBL, MED1 and SMC1A were scanned for known human transcription factor binding site models from the HOCOMOCO v9<sup>10</sup> database using the

(<https://www.bioconductor.org/packages/release/bioc/html/PWMErich.html>).

### **Lentiviral shRNAs**

Lentiviruses were produced according to the TRC1.5 system from Sigma and plasmids and shRNA sequences used are shown in the **Supplementary Table S3**. The packaging cell line HEK293T was used to produce lentiviral particles containing the pLKO.1 vectors. Cells were transfected with 1:3:6 µg DNA respectively composed of packaging vectors pMD2.G (Addgene, #12259) and psPAX2 (Addgene, #12260), as well as the specific shRNA constructs. Transfections were performed with X-tremGENE 9 transfection reagent (Roche), according to manufacturer's instructions. Supernatants were harvested 48h following transfection. Supernatants were filtered and added to recipient cell lines with 8 µg/mL polybrene (SIGMA, H9268), as described on Addgene website. Cells infected with the lentivirus were incubated 24h before selection with puromycin for 48 h. To assess the efficiency of each shRNA, Western blot analyses were performed using antibodies against NIPBL, (Bethyl, A301-779A, 1:1000), MED1 (Bethyl A300-793A, 1:5000), SMC1A (Bethyl, A300-055A, 1:5000), ERα (Santa Cruz, sc-543x, 1:5000), FOXA1 (Santa Cruz, sc-101058, 1:1000), FOXA2 (Abnova, 89-019-034, 1:1000 ), HNF4A (Santa Cruz, sc-8987x, 1:1000), FOSL2 (Santa Cruz, sc-604x, 1:1000), GAPDH (Pierce, PIMA515738, 1:25000) and Vinculin (SIGMA, V9131, 1:50000)..

### **Cell proliferation assays (*Figs 2b and 4a*)**

Cell proliferation assays were performed on A549, HEPG2 and MCF7 with cells infected with lentiviruses containing the validated shRNA constructs. For the Cytation 5 cell Imaging Multi-Mode Reader (BioTek Instruments), A549 ( $5 \times 10^3$  cells/well) were seeded into black-sided clear bottom 96-well plates (Corning, 3603), while HEPG2 ( $1.2 \times 10^5$  cells/well) and MCF7 ( $1.5 \times 10^4$  cells/well) were seeded into clear bottom 12-well plates (Corning, 3513), following a 24h selection. Cells were stained with Hoechst 33342 at 10µg/ml in media for 30 min, at 37°C, prior to imaging. Cell proliferation was measured up to 8 days after seeding. All cell nucleus counting experiments were performed in biological duplicates or triplicates (using 16 fields/well with a 4X microscope objective. Threshold was set to 8,000 with a minimum object size of 5 µm and a maximum size set to 100 µm.

For the xCELLigence Real-Time Cell Analyzer (RTCA) instrument (ESBE Scientific and ACEA Biosciences), MCF7 ( $1.5 \times 10^4$  cells/well) were seeded into E-Plate VIEW 16 PET, a specialized 16-well plate used with the RTCA instrument, into selection media. The cell proliferation index was measured using impedance up to 8 days after seeding.

### **Soft agar colony formation assays (Figs 2c and 4b)**

Soft agar colony formation assays were performed as previously described <sup>11</sup>. MCF7, HEPG2 and A549 cells infected with lentiviruses containing the validated shRNA constructs and selected for 24 hours were used. Two days after their infection, cells were seeded in complete growth medium with 0.3% agar layered onto 0.5% agar beds in 6-well plates (A549:  $2 \times 10^4$  cells/well, HEPG2:  $2 \times 10^4$  cells/well and MCF7:  $6 \times 10^4$  cells/well). Complete medium was added on top twice a week for 13 days (A549 and HEPG2) or 28 days (MCF7). Colonies larger than  $800 \mu\text{m}^2$  were counted as positive for growth with ImageJ 1.46r software (NIH).

### **Supplementary References**

1. Kagey, M. H. *et al.* Mediator and cohesin connect gene expression and chromatin architecture. *Nature* **467**, 430–5 (2010).
2. Bilodeau, S., Kagey, M. H., Frampton, G. M., Rahl, P. B. & Young, R. A. SetDB1 contributes to repression of genes encoding developmental regulators and maintenance of ES cell state. *Genes Dev.* **23**, 2484–9 (2009).
3. Bolger, A. M., Lohse, M. & Usadel, B. Trimmomatic: a flexible trimmer for Illumina sequence data. *Bioinformatics* **30**, 2114–2120 (2014).
4. Li, H. *et al.* The Sequence Alignment/Map format and SAMtools. *Bioinformatics* **25**, 2078–2079 (2009).
5. Zhang, Y. *et al.* Model-based Analysis of ChIP-Seq (MACS). *Genome Biol.* **9**, R137 (2008).
6. Yu, G., Wang, L.-G. & He, Q.-Y. ChIPseeker: an R/Bioconductor package for ChIP peak annotation, comparison and visualization. *Bioinformatics* **31**, 2382–2383 (2015).
7. Quinlan, A. R. & Hall, I. M. BEDTools: a flexible suite of utilities for comparing genomic features. *Bioinformatics* **26**, 841–842 (2010).

8. Ernst, J. *et al.* Mapping and analysis of chromatin state dynamics in nine human cell types. *Nature* **473**, 43–9 (2011).
9. Kundaje, A. *et al.* Integrative analysis of 111 reference human epigenomes. *Nature* **518**, 317–330 (2015).
10. Kulakovskiy, I. V *et al.* HOCOMOCO: a comprehensive collection of human transcription factor binding sites models. *Nucleic Acids Res.* **41**, D195–202 (2013).
11. Oster, S. K., Mao, D. Y. L., Kennedy, J. & Penn, L. Z. Functional analysis of the N-terminal domain of the Myc oncoprotein. *Oncogene* **22**, 1998–2010 (2003).

Fournier\_Supplementary Figure S1

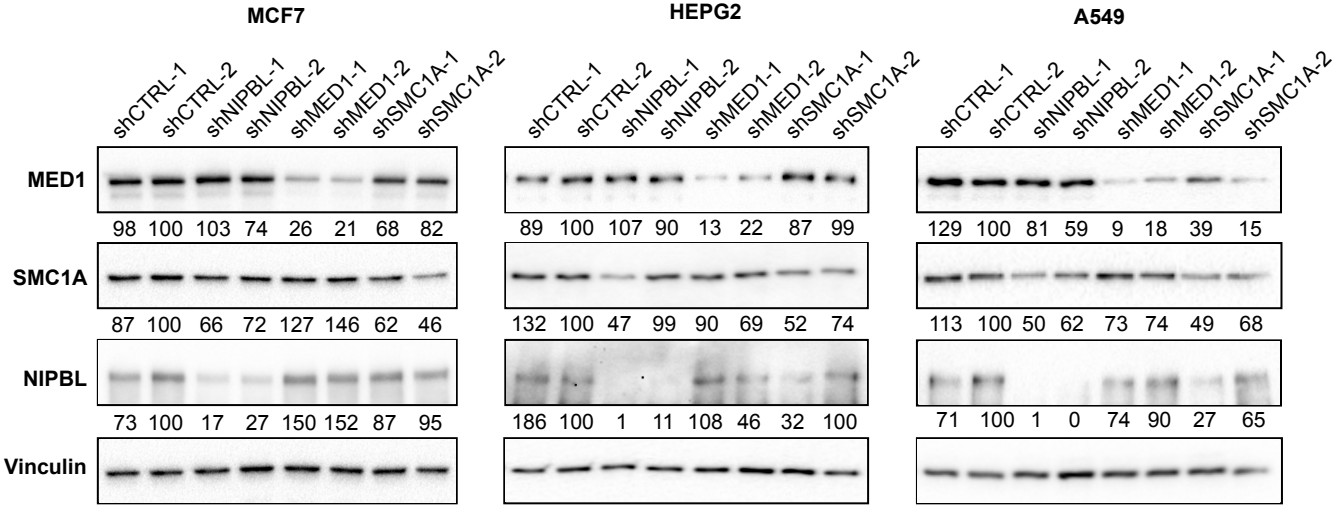

Fournier\_Supplementary Figure S2

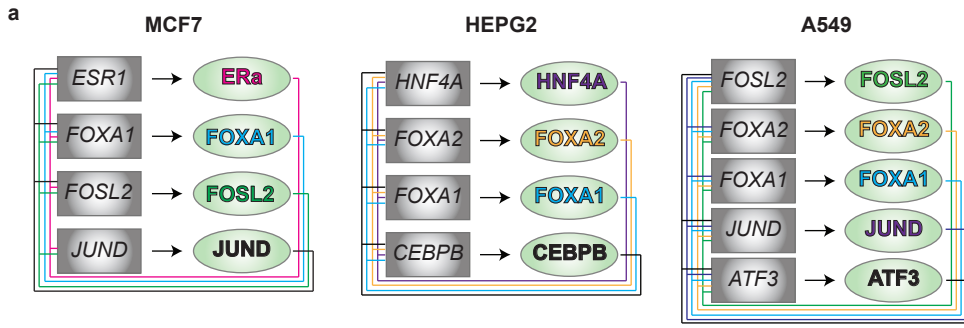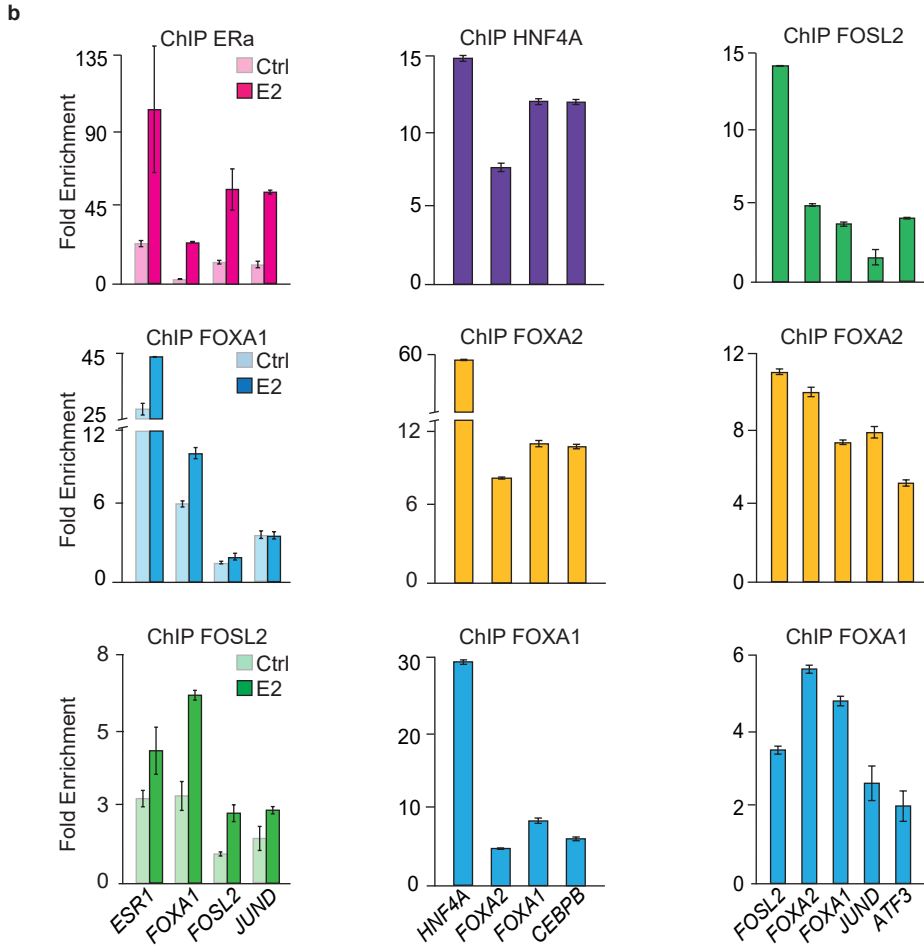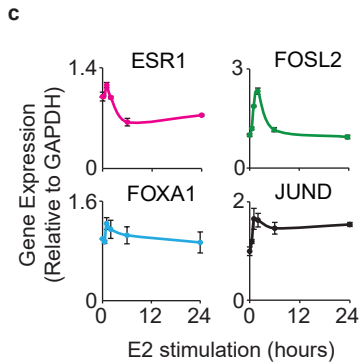

Fournier\_Supplementary Figure S3

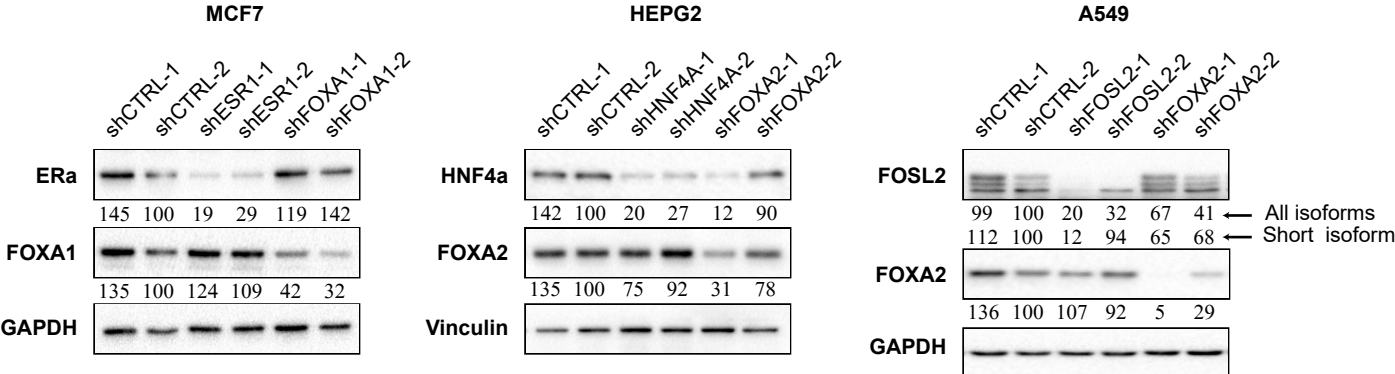



Fournier\_Supplementary Figure S4

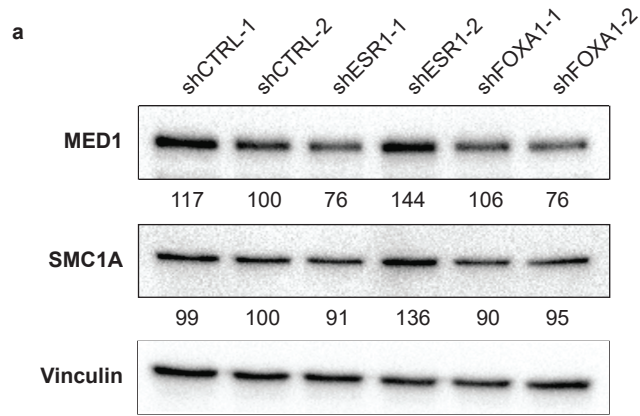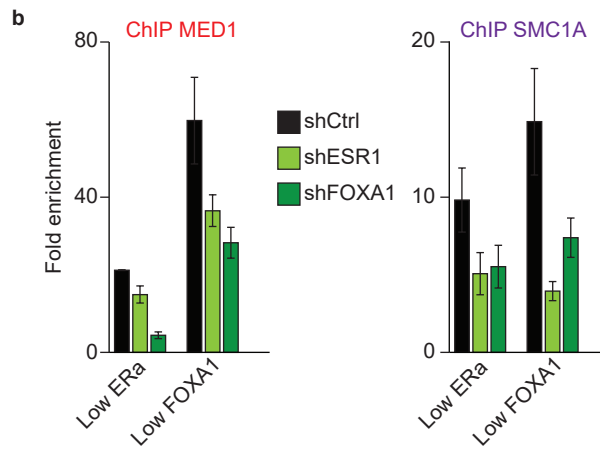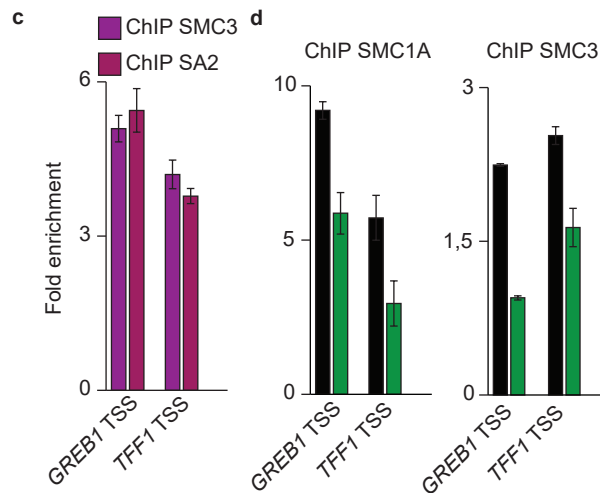

**Supplementary Table S1 – KEGG pathways enriched with genes occupied by MED1, SMC1A and NIPBL in MCF7, HEPG2 and A549 cells.**

|                                                      | -log <sub>10</sub> (FDR corrected p-value) |            |            |
|------------------------------------------------------|--------------------------------------------|------------|------------|
|                                                      | HEPG2                                      | MCF7       | A549       |
| hsa00970 Aminoacyl-tRNA biosynthesis                 | 0.06448989                                 | 0.1352676  | 0.0173519  |
| hsa02010 ABC transporters                            | 0.88476264                                 | 0.45408152 | 1.80907079 |
| hsa03008 Ribosome biogenesis in eukaryotes           | 0.03666085                                 | 0.08763324 | 0.00549542 |
| hsa03010 Ribosome                                    | 0.0081719                                  | 0.03666085 | 0.00526644 |
| hsa03013 RNA transport                               | 0.0037942                                  | 0.01820138 | 0.01809528 |
| hsa03015 mRNA surveillance pathway                   | 0.13116847                                 | 0.08333723 | 0.03204529 |
| hsa03018 RNA degradation                             | 0.04760122                                 | 0.29100893 | 0.36194062 |
| hsa03020 RNA polymerase                              | 0.18573026                                 | 0.26993475 | 0.0914896  |
| hsa03022 Basal transcription factors                 | 0.31232912                                 | 0.45408152 | 0.04760122 |
| hsa03030 DNA replication                             | 0.16345299                                 | 0.24263714 | 0.23081073 |
| hsa03040 Spliceosome                                 | 0.04760122                                 | 0.03778088 | 0.00549542 |
| hsa03050 Proteasome                                  | 0.31428034                                 | 0.20452893 | 0.04760122 |
| hsa03060 Protein export                              | 0.24263714                                 | 0.31428034 | 0.65354423 |
| hsa03320 PPAR signaling pathway                      | 3.37498227                                 | 0.31428034 | 0.294212   |
| hsa03410 Base excision repair                        | 0.18047004                                 | 0.26152946 | 0.08690141 |
| hsa03420 Nucleotide excision repair                  | 0.30530343                                 | 0.44019414 | 0.30530343 |
| hsa03430 Mismatch repair                             | 0.24263714                                 | 0.31428034 | 0.35364118 |
| hsa03440 Homologous recombination                    | 0.45408152                                 | 0.28263629 | 0.29100893 |
| hsa03450 Non-homologous end-joining                  | 0.33263641                                 | 0.42695714 | 0.24837149 |
| hsa03460 Fanconi anemia pathway                      | 0.27876652                                 | 0.72059919 | 0.27109174 |
| hsa04010 MAPK signaling pathway                      | 1.03566082                                 | 0.70771226 | 1.13728408 |
| hsa04012 ErbB signaling pathway                      | 0.43715382                                 | 0.45121207 | 1.05343614 |
| hsa04014 Ras signaling pathway                       | 0.84592124                                 | 0.31428034 | 1.08501418 |
| hsa04015 Rap1 signaling pathway                      | 0.44925419                                 | 1.34726651 | 2.23139097 |
| hsa04020 Calcium signaling pathway                   | 0.79585701                                 | 0.45121207 | 1.07781407 |
| hsa04022 cGMP-PKG signaling pathway                  | 1.08501418                                 | 1.20476898 | 0.43052127 |
| hsa04024 cAMP signaling pathway                      | 0.36194062                                 | 0.98704607 | 0.74617128 |
| hsa04060 Cytokine-cytokine receptor interaction      | 0.79898036                                 | 0.24837149 | 1.80907079 |
| hsa04062 Chemokine signaling pathway                 | 1.3041869                                  | 0.8281362  | 0.32561133 |
| hsa04064 NF-kappa B signaling pathway                | 0.85891916                                 | 0.08333723 | 0.78294821 |
| hsa04066 HIF-1 signaling pathway                     | 1.90543498                                 | 0.61199009 | 1.80907079 |
| hsa04068 FoxO signaling pathway                      | 1.383675                                   | 0.44053573 | 1.20699442 |
| hsa04070 Phosphatidylinositol signaling system       | 0.80134283                                 | 0.9119735  | 0.51172707 |
| hsa04071 Sphingolipid signaling pathway              | 0.42747802                                 | 0.5101745  | 0.16615426 |
| hsa04080 Neuroactive ligand-receptor interaction     | 0.05611979                                 | 0.62106254 | 0.38551948 |
| hsa04110 Cell cycle                                  | 0.40622927                                 | 0.30530343 | 0.32608645 |
| hsa04114 Oocyte meiosis                              | 0.19172148                                 | 0.55697608 | 0.29100893 |
| hsa04115 p53 signaling pathway                       | 0.36194062                                 | 1.20699442 | 0.87162763 |
| hsa04120 Ubiquitin mediated proteolysis              | 0.23360708                                 | 0.27899562 | 0.28263629 |
| hsa04122 Sulfur relay system                         | 0.88476264                                 | 0.46800068 | 0.29100893 |
| hsa04130 SNARE interactions in vesicular transport   | 0.17428611                                 | 0.25265786 | 0.70791776 |
| hsa04140 Regulation of autophagy                     | 0.14722851                                 | 0.22553797 | 0.0628508  |
| hsa04141 Protein processing in endoplasmic reticulum | 0.35364118                                 | 0.32091736 | 0.31428034 |
| hsa04142 Lysosome                                    | 0.28263629                                 | 0.16615426 | 0.03301846 |
| hsa04144 Endocytosis                                 | 0.53353389                                 | 0.36194062 | 0.83877231 |
| hsa04145 Phagosome                                   | 0.42414457                                 | 0.23500199 | 0.21447197 |
| hsa04146 Peroxisome                                  | 1.20699442                                 | 0.09783438 | 0.11910916 |
| hsa04150 mTOR signaling pathway                      | 0.67680873                                 | 0.35714788 | 0.54287035 |
| hsa04151 PI3K-Akt signaling pathway                  | 0.36194062                                 | 0.56704944 | 1.64368251 |
| hsa04152 AMPK signaling pathway                      | 0.59038668                                 | 0.30530343 | 0.96434529 |
| hsa04210 Apoptosis                                   | 1.20537507                                 | 0.27109174 | 0.84629036 |
| hsa04260 Cardiac muscle contraction                  | 0.16779307                                 | 0.80197349 | 0.36194062 |
| hsa04261 Adrenergic signaling in cardiomyocytes      | 0.30727917                                 | 0.82766809 | 0.31428034 |
| hsa04270 Vascular smooth muscle contraction          | 0.83098243                                 | 1.30206728 | 0.82766809 |
| hsa04310 Wnt signaling pathway                       | 1.30206728                                 | 0.27109174 | 1.81815184 |
| hsa04320 Dorsal-ventral axis formation               | 1.80907079                                 | 0.65928509 | 1.20699442 |
| hsa04330 Notch signaling pathway                     | 0.2970733                                  | 0.43420076 | 0.72059919 |
| hsa04340 Hedgehog signaling pathway                  | 0.28428077                                 | 0.18261675 | 0.44019414 |
| hsa04350 TGF-beta signaling pathway                  | 0.69026265                                 | 1.05913914 | 2.93344883 |
| hsa04360 Axon guidance                               | 0.7819282                                  | 0.70924373 | 1.30206728 |
| hsa04370 VEGF signaling pathway                      | 0.4160026                                  | 0.35364118 | 0.75842459 |
| hsa04380 Osteoclast differentiation                  | 1.20476898                                 | 0.93889294 | 1.07781407 |
| hsa04390 Hippo signaling pathway                     | 1.20537507                                 | 1.62576397 | 3.25432318 |
| hsa04510 Focal adhesion                              | 0.8281362                                  | 0.75705689 | 3.06722551 |
| hsa04512 ECM-receptor interaction                    | 0.15462351                                 | 1.07781407 | 1.09981997 |
| hsa04514 Cell adhesion molecules (CAMs)              | 0.32374736                                 | 0.4160026  | 0.45408152 |
| hsa04520 Adherens junction                           | 1.08501418                                 | 0.30530343 | 3.53315075 |

|                                                       |            |            |            |
|-------------------------------------------------------|------------|------------|------------|
| hsa04530 Tight junction                               | 0.12782002 | 0.27876652 | 0.98704607 |
| hsa04540 Gap junction                                 | 0.65354423 | 0.44376705 | 0.30530343 |
| hsa04550 Signaling pathways regulating pluripotency c | 2.40080884 | 0.85725599 | 3.25432318 |
| hsa04610 Complement and coagulation cascades          | 2.42901562 | 0.13116847 | 0.64253303 |
| hsa04611 Platelet activation                          | 1.05343614 | 0.75193439 | 0.33844188 |
| hsa04612 Antigen processing and presentation          | 0.04760122 | 0.11215822 | 0.00927162 |
| hsa04614 Renin-angiotensin system                     | 0.95348518 | 0.31428034 | 0.65354423 |
| hsa04620 Toll-like receptor signaling pathway         | 0.20675133 | 0.36194062 | 0.21993112 |
| hsa04621 NOD-like receptor signaling pathway          | 0.44053573 | 0.16118378 | 0.24009169 |
| hsa04622 RIG-I-like receptor signaling pathway        | 0.35338791 | 0.31279641 | 0.06634004 |
| hsa04623 Cytosolic DNA-sensing pathway                | 0.21993112 | 0.13839477 | 0.19890669 |
| hsa04630 Jak-STAT signaling pathway                   | 0.75193439 | 0.35516932 | 1.30206728 |
| hsa04640 Hematopoietic cell lineage                   | 0.43715382 | 0.26349006 | 0.20093494 |
| hsa04650 Natural killer cell mediated cytotoxicity    | 0.35714788 | 0.28428077 | 0.02137295 |
| hsa04660 T cell receptor signaling pathway            | 0.75193439 | 0.86653541 | 0.1352316  |
| hsa04662 B cell receptor signaling pathway            | 0.82432591 | 0.84880426 | 0.28263629 |
| hsa04664 Fc epsilon RI signaling pathway              | 0.60457038 | 0.59038668 | 0.66590546 |
| hsa04666 Fc gamma R-mediated phagocytosis             | 1.09912109 | 0.98308861 | 0.97054854 |
| hsa04668 TNF signaling pathway                        | 0.9119735  | 0.56704944 | 2.38790137 |
| hsa04670 Leukocyte transendothelial migration         | 0.43613898 | 0.31596355 | 1.20699442 |
| hsa04672 Intestinal immune network for IgA productio  | 0.30530343 | 0.19464349 | 0.04385493 |
| hsa04710 Circadian rhythm                             | 0.78294821 | 0.27356757 | 0.46967574 |
| hsa04713 Circadian entrainment                        | 0.38551948 | 0.95348518 | 0.37807177 |
| hsa04720 Long-term potentiation                       | 0.61540791 | 0.32561133 | 0.45582565 |
| hsa04721 Synaptic vesicle cycle                       | 0.06959479 | 0.34168589 | 0.32608645 |
| hsa04722 Neurotrophin signaling pathway               | 0.61894828 | 0.31428034 | 0.16615426 |
| hsa04723 Retrograde endocannabinoid signaling         | 0.22541751 | 0.62681662 | 0.34331287 |
| hsa04724 Glutamatergic synapse                        | 0.87162763 | 1.33573973 | 0.53683756 |
| hsa04725 Cholinergic synapse                          | 0.46505437 | 0.82766809 | 0.11477478 |
| hsa04726 Serotonergic synapse                         | 0.19172148 | 0.19172148 | 0.40123762 |
| hsa04727 GABAergic synapse                            | 0.43420076 | 1.02696491 | 0.43676602 |
| hsa04728 Dopaminergic synapse                         | 0.3741105  | 0.29235464 | 0.13534378 |
| hsa04730 Long-term depression                         | 0.42414457 | 0.35714788 | 0.77539653 |
| hsa04740 Olfactory transduction                       | 0.00064792 | 0.00927162 | 0.00193814 |
| hsa04742 Taste transduction                           | 0.10117202 | 0.40667886 | 0.27876652 |
| hsa04744 Phototransduction                            | 0.20452893 | 0.28489626 | 0.29841977 |
| hsa04750 Inflammatory mediator regulation of TRP ch   | 1.05343614 | 1.20699442 | 3.2145199  |
| hsa04810 Regulation of actin cytoskeleton             | 0.59038668 | 1.09981997 | 0.76503832 |
| hsa04910 Insulin signaling pathway                    | 1.09404656 | 0.1352316  | 0.18573026 |
| hsa04911 Insulin secretion                            | 0.28489626 | 1.05343614 | 0.65354423 |
| hsa04912 GnRH signaling pathway                       | 0.4160026  | 0.69026265 | 0.78294821 |
| hsa04913 Ovarian steroidogenesis                      | 0.28666618 | 0.75842459 | 1.55025317 |
| hsa04914 Progesterone-mediated oocyte maturation      | 0.28263629 | 1.03566082 | 0.30727917 |
| hsa04915 Estrogen signaling pathway                   | 0.56307329 | 1.20537507 | 0.06773798 |
| hsa04916 Melanogenesis                                | 0.36194062 | 0.3848011  | 0.85725599 |
| hsa04917 Prolactin signaling pathway                  | 0.82432591 | 1.20476898 | 0.60457038 |
| hsa04918 Thyroid hormone synthesis                    | 0.56704944 | 0.5598669  | 0.28489626 |
| hsa04919 Thyroid hormone signaling pathway            | 0.84592124 | 1.05343614 | 1.04486087 |
| hsa04920 Adipocytokine signaling pathway              | 1.43121608 | 0.56704944 | 1.08501418 |
| hsa04921 Oxytocin signaling pathway                   | 0.28428077 | 1.56271724 | 0.78294821 |
| hsa04922 Glucagon signaling pathway                   | 0.54570427 | 0.37894248 | 0.34331287 |
| hsa04960 Aldosterone-regulated sodium reabsorption    | 1.31857664 | 0.88476264 | 0.88476264 |
| hsa04961 Endocrine and other factor-regulated calciu  | 0.30530343 | 0.78606864 | 0.30530343 |
| hsa04962 Vasopressin-regulated water reabsorption     | 0.13116847 | 0.45408152 | 0.04760122 |
| hsa04964 Proximal tubule bicarbonate reclamation      | 0.54570427 | 0.31428034 | 0.35364118 |
| hsa04966 Collecting duct acid secretion               | 0.211747   | 0.65928509 | 0.12177361 |
| hsa04970 Salivary secretion                           | 0.42747802 | 0.44019414 | 0.43052127 |
| hsa04971 Gastric acid secretion                       | 0.5394339  | 0.83485935 | 0.58187188 |
| hsa04972 Pancreatic secretion                         | 0.59038668 | 0.6552596  | 0.53485508 |
| hsa04973 Carbohydrate digestion and absorption        | 0.87162763 | 0.45408152 | 0.04760122 |
| hsa04974 Protein digestion and absorption             | 0.64253303 | 1.30206728 | 0.99575064 |
| hsa04975 Fat digestion and absorption                 | 1.80907079 | 0.21775761 | 0.35364118 |
| hsa04976 Bile secretion                               | 0.56704944 | 1.20537507 | 0.83098243 |
| hsa04977 Vitamin digestion and absorption             | 1.31857664 | 0.30610017 | 0.96758561 |
| hsa04978 Mineral absorption                           | 0.28428077 | 0.4160026  | 0.28263629 |
| hsa00010 Glycolysis / Gluconeogenesis                 | 0.36194062 | 0.1346108  | 0.45408152 |
| hsa00020 Citrate cycle (TCA cycle)                    | 0.19464349 | 0.27876652 | 0.28428077 |
| hsa00030 Pentose phosphate pathway                    | 0.45408152 | 1.07781407 | 0.82766809 |
| hsa00040 Pentose and glucuronate interconversions     | 0.37387207 | 0.54287035 | 1.68440823 |
| hsa00051 Fructose and mannose metabolism              | 0.42414457 | 0.26993475 | 0.27094648 |
| hsa00052 Galactose metabolism                         | 0.44053573 | 0.27876652 | 0.49755095 |
| hsa00053 Ascorbate and aldarate metabolism            | 0.46924688 | 0.29100893 | 1.64706179 |

|          |                                                            |            |            |            |
|----------|------------------------------------------------------------|------------|------------|------------|
| hsa00061 | Fatty acid biosynthesis                                    | 2.964536   | 0.42695714 | 0.24837149 |
| hsa00062 | Fatty acid elongation                                      | 0.22553797 | 0.30530343 | 0.1346108  |
| hsa00071 | Fatty acid degradation                                     | 2.26999488 | 0.20452893 | 0.18047004 |
| hsa00072 | Synthesis and degradation of ketone bodies                 | 0.37988252 | 0.46800068 | 0.29100893 |
| hsa00100 | Steroid biosynthesis                                       | 1.04486087 | 1.28155332 | 0.40123762 |
| hsa00120 | Primary bile acid biosynthesis                             | 1.10808662 | 0.36194062 | 0.19890669 |
| hsa00130 | Ubiquinone and other terpenoid-quinone biosynthesis        | 0.84696662 | 0.45408152 | 0.64253303 |
| hsa00140 | Steroid hormone biosynthesis                               | 0.43585987 | 0.15738486 | 1.30206728 |
| hsa00190 | Oxidative phosphorylation                                  | 0.13534378 | 0.28489626 | 0.00549542 |
| hsa00230 | Purine metabolism                                          | 0.13551339 | 0.30727917 | 0.63611076 |
| hsa00232 | Caffeine metabolism                                        | 0.53800258 | 0.64253303 | 0.98704607 |
| hsa00240 | Pyrimidine metabolism                                      | 0.33836256 | 0.20452893 | 0.22337659 |
| hsa00250 | Alanine, aspartate and glutamate metabolism                | 0.70771226 | 0.24837149 | 0.69026265 |
| hsa00260 | Glycine, serine and threonine metabolism                   | 0.14308613 | 0.22288598 | 0.20093494 |
| hsa00270 | Cysteine and methionine metabolism                         | 0.88476264 | 0.20452893 | 0.32160523 |
| hsa00280 | Valine, leucine and isoleucine degradation                 | 0.30530343 | 0.19464349 | 0.04385493 |
| hsa00290 | Valine, leucine and isoleucine biosynthesis                | 0.59038668 | 0.69026265 | 0.45408152 |
| hsa00300 | Lysine biosynthesis                                        | 0.75184517 | 0.83877231 | 0.62315874 |
| hsa00310 | Lysine degradation                                         | 0.28263629 | 0.1798849  | 0.27876652 |
| hsa00330 | Arginine and proline metabolism                            | 0.28666618 | 0.18573026 | 0.68827865 |
| hsa00340 | Histidine metabolism                                       | 0.95348518 | 0.31428034 | 0.65354423 |
| hsa00350 | Tyrosine metabolism                                        | 0.70771226 | 0.24837149 | 0.69026265 |
| hsa00360 | Phenylalanine metabolism                                   | 0.67219723 | 0.36194062 | 1.20699442 |
| hsa00380 | Tryptophan metabolism                                      | 0.96868685 | 0.22288598 | 0.36194062 |
| hsa00400 | Phenylalanine, tyrosine and tryptophan biosynthesis        | 1.20537507 | 0.64253303 | 0.98704607 |
| hsa00410 | beta-Alanine metabolism                                    | 0.43420076 | 0.27356757 | 0.78294821 |
| hsa00430 | Taurine and hypotaurine metabolism                         | 0.36194062 | 0.45408152 | 0.28056609 |
| hsa00450 | Selenocompound metabolism                                  | 0.29100893 | 0.36194062 | 0.45408152 |
| hsa00460 | Cyanoamino acid metabolism                                 | 0.45408152 | 0.56294305 | 0.34957002 |
| hsa00471 | D-Glutamine and D-glutamate metabolism                     | 0.59038668 | 0.69026265 | 1.08501418 |
| hsa00472 | D-Arginine and D-ornithine metabolism                      | 0.88476264 | 0.98894236 | 0.78294821 |
| hsa00480 | Glutathione metabolism                                     | 0.28428077 | 0.18261675 | 0.03666085 |
| hsa00500 | Starch and sucrose metabolism                              | 0.72726789 | 0.16436535 | 1.08501418 |
| hsa00510 | N-Glycan biosynthesis                                      | 0.82766809 | 0.18889409 | 0.45408152 |
| hsa00511 | Other glycan degradation                                   | 1.08501418 | 0.35714788 | 0.19172148 |
| hsa00512 | Mucin type O-Glycan biosynthesis                           | 1.14845944 | 0.60457038 | 1.43192959 |
| hsa00514 | Other types of O-glycan biosynthesis                       | 0.43420076 | 0.27356757 | 0.78294821 |
| hsa00520 | Amino sugar and nucleotide sugar metabolism                | 0.83099427 | 0.19172148 | 0.29754233 |
| hsa00524 | Butirosin and neomycin biosynthesis                        | 1.20537507 | 0.64253303 | 0.42012315 |
| hsa00531 | Glycosaminoglycan degradation                              | 0.62770512 | 0.34719976 | 0.18261675 |
| hsa00532 | Glycosaminoglycan biosynthesis - chondroitin-6-sulfate     | 0.60457038 | 0.78512292 | 0.40123762 |
| hsa00533 | Glycosaminoglycan biosynthesis - keratan sulfate           | 0.72531309 | 0.8850649  | 0.50629835 |
| hsa00534 | Glycosaminoglycan biosynthesis - heparan sulfate           | 2.74847876 | 1.19069333 | 0.33836256 |
| hsa00561 | Glycerolipid metabolism                                    | 0.98704607 | 0.15462351 | 0.55697608 |
| hsa00562 | Inositol phosphate metabolism                              | 0.56704944 | 0.85891916 | 0.42608461 |
| hsa00563 | Glycosylphosphatidylinositol(GPI)-anchor biosynthesis      | 0.22553797 | 0.30530343 | 0.1346108  |
| hsa00564 | Glycerophospholipid metabolism                             | 1.08501418 | 0.23360708 | 0.54287035 |
| hsa00565 | Ether lipid metabolism                                     | 0.87162763 | 0.20093494 | 0.31428034 |
| hsa00590 | Arachidonic acid metabolism                                | 0.22738515 | 0.14479506 | 0.74617128 |
| hsa00591 | Linoleic acid metabolism                                   | 0.45408152 | 0.28263629 | 0.52086844 |
| hsa00592 | alpha-Linolenic acid metabolism                            | 0.51172707 | 0.30530343 | 0.60405584 |
| hsa00600 | Sphingolipid metabolism                                    | 0.84592124 | 0.19464349 | 0.04385493 |
| hsa00601 | Glycosphingolipid biosynthesis - lacto and neolacto series | 1.28155332 | 0.29539896 | 0.31428034 |
| hsa00603 | Glycosphingolipid biosynthesis - globo series              | 1.87654726 | 2.42901562 | 0.23360708 |
| hsa00604 | Glycosphingolipid biosynthesis - ganglio series            | 1.20537507 | 0.8850649  | 0.50629835 |
| hsa00620 | Pyruvate metabolism                                        | 0.34468011 | 0.22288598 | 0.36194062 |
| hsa00630 | Glyoxylate and dicarboxylate metabolism                    | 0.45408152 | 0.28489626 | 0.11580111 |
| hsa00640 | Propanoate metabolism                                      | 0.18573026 | 0.26993475 | 0.45408152 |
| hsa00650 | Butanoate metabolism                                       | 0.211747   | 0.29100893 | 0.12177361 |
| hsa00670 | One carbon pool by folate                                  | 0.27110033 | 0.33747584 | 0.40123762 |
| hsa00730 | Thiamine metabolism                                        | 0.59038668 | 0.69026265 | 0.45408152 |
| hsa00740 | Riboflavin metabolism                                      | 0.59038668 | 0.69026265 | 1.08501418 |
| hsa00750 | Vitamin B6 metabolism                                      | 0.48561659 | 0.5958386  | 1.51492444 |
| hsa00760 | Nicotinate and nicotinamide metabolism                     | 0.82404684 | 1.07781407 | 0.52086844 |
| hsa00770 | Pantothenate and CoA biosynthesis                          | 1.08501418 | 0.35714788 | 0.19172148 |
| hsa00780 | Biotin metabolism                                          | 0.65354423 | 0.75842459 | 1.20699442 |
| hsa00785 | Lipoic acid metabolism                                     | 0.65354423 | 0.75842459 | 0.53353389 |
| hsa00790 | Folate biosynthesis                                        | 0.31596355 | 0.4106878  | 0.23360708 |
| hsa00830 | Retinol metabolism                                         | 0.06634004 | 0.13551339 | 1.43192959 |
| hsa00860 | Porphyrin and chlorophyll metabolism                       | 0.13534378 | 0.21206425 | 1.43121608 |
| hsa00900 | Terpenoid backbone biosynthesis                            | 0.24931982 | 0.31596355 | 0.15462351 |
| hsa00910 | Nitrogen metabolism                                        | 0.67219723 | 0.36194062 | 0.19890669 |

|                                                       |            |            |            |
|-------------------------------------------------------|------------|------------|------------|
| hsa00920 Sulfur metabolism                            | 0.88476264 | 0.46800068 | 0.67509174 |
| hsa00980 Metabolism of xenobiotics by cytochrome P450 | 0.32608645 | 0.118757   | 1.02696491 |
| hsa00982 Drug metabolism - cytochrome P450            | 0.20219592 | 0.1324597  | 0.87162763 |
| hsa00983 Drug metabolism - other enzymes              | 0.30565481 | 0.19776214 | 1.30206728 |
| hsa01040 Biosynthesis of unsaturated fatty acids      | 0.24263714 | 0.31428034 | 0.14482444 |
| hsa01100 Metabolic pathways                           | 1.80907079 | 0.04760122 | 0.64634045 |
| hsa01200 Carbon metabolism                            | 0.30727917 | 0.33747584 | 0.54287035 |
| hsa01210 2-Oxocarboxylic acid metabolism              | 0.67219723 | 0.36194062 | 0.45408152 |
| hsa01212 Fatty acid metabolism                        | 1.55025317 | 0.19172148 | 0.04185459 |
| hsa01220 Degradation of aromatic compounds            | 0.65354423 | 0.75842459 | 0.53353389 |
| hsa01230 Biosynthesis of amino acids                  | 0.5394339  | 0.53800258 | 0.58187188 |

**Supplementary Table S2 - List of ChIP-Seq datasets used in the study (MCF7 cells)**

| <b>Biosample_name</b> | <b>Target</b> | <b>Experiment</b>                                  | <b>Accession</b> |
|-----------------------|---------------|----------------------------------------------------|------------------|
| MCF-7                 | Control       | Data will be provided through GEO upon publication |                  |
| MCF-7                 | NIPBL         | Data will be provided through GEO upon publication |                  |
| MCF-7                 | MED1          | Data will be provided through GEO upon publication |                  |
| MCF-7                 | SMC1A         | Data will be provided through GEO upon publication |                  |
| MCF-7                 | Era           | Data will be provided through GEO upon publication |                  |
| MCF-7                 | CEBPB         | ENCSR000BSR                                        | ENCFF000QLL      |
| MCF-7                 | CEBPB         | ENCSR000BSR                                        | ENCFF000QLO      |
| MCF-7                 | Control       | ENCSR000EWW                                        | ENCFF000VHM      |
| MCF-7                 | Control       | ENCSR000EWW                                        | ENCFF000VHL      |
| MCF-7                 | Control       | ENCSR000DWI                                        | ENCFF001HUM      |
| MCF-7                 | Control       | ENCSR000DMW                                        | ENCFF000SAZ      |
| MCF-7                 | Control       | ENCSR000AHE                                        | ENCFF000QQJ      |
| MCF-7                 | Control       | ENCSR000AHE                                        | ENCFF000QQG      |
| MCF-7                 | Control       | ENCSR000AHE                                        | ENCFF000QQI      |
| MCF-7                 | Control       | ENCSR000AHE                                        | ENCFF000QQK      |
| MCF-7                 | CTCF          | ENCSR000DWH                                        | ENCFF001HUF      |
| MCF-7                 | CTCF          | ENCSR000DWH                                        | ENCFF001HUG      |
| MCF-7                 | CTCF          | ENCSR000DMV                                        | ENCFF000RZX      |
| MCF-7                 | CTCF          | ENCSR000DMV                                        | ENCFF000RZY      |
| MCF-7                 | CTCF          | ENCSR000DMS                                        | ENCFF000SAB      |
| MCF-7                 | CTCF          | ENCSR000DMS                                        | ENCFF000SAD      |
| MCF-7                 | CTCF          | ENCSR000DMR                                        | ENCFF000SAY      |
| MCF-7                 | CTCF          | ENCSR000DMR                                        | ENCFF000SAX      |
| MCF-7                 | CTCF          | ENCSR000DMO                                        | ENCFF000SAL      |
| MCF-7                 | CTCF          | ENCSR000DMO                                        | ENCFF000SAK      |
| MCF-7                 | CTCF          | ENCSR000DML                                        | ENCFF000SAP      |
| MCF-7                 | CTCF          | ENCSR000DML                                        | ENCFF000SAO      |
| MCF-7                 | CTCF          | ENCSR000AHD                                        | ENCFF000QLW      |
| MCF-7                 | CTCF          | ENCSR000AHD                                        | ENCFF000QLT      |
| MCF-7                 | EGR1          | ENCSR000BUX                                        | ENCFF000QMF      |
| MCF-7                 | EGR1          | ENCSR000BUX                                        | ENCFF000QMC      |
| MCF-7                 | ELF1          | ENCSR000BSS                                        | ENCFF000QMJ      |
| MCF-7                 | ELF1          | ENCSR000BSS                                        | ENCFF000QMK      |
| MCF-7                 | EP300         | ENCSR000BTR                                        | ENCFF000QPK      |
| MCF-7                 | EP300         | ENCSR000BTR                                        | ENCFF000QPP      |
| MCF-7                 | FOSL2         | ENCSR000BUI                                        | ENCFF000QMU      |
| MCF-7                 | FOSL2         | ENCSR000BUI                                        | ENCFF000QMS      |
| MCF-7                 | FOXM1         | ENCSR000BUJ                                        | ENCFF000QMZ      |
| MCF-7                 | FOXM1         | ENCSR000BUJ                                        | ENCFF000QNC      |
| MCF-7                 | GABPA         | ENCSR000BUK                                        | ENCFF000QNK      |
| MCF-7                 | GABPA         | ENCSR000BUK                                        | ENCFF000QNJ      |
| MCF-7                 | GATA3         | ENCSR000EWV                                        | ENCFF000ZKL      |
| MCF-7                 | GATA3         | ENCSR000EWV                                        | ENCFF000ZKJ      |
| MCF-7                 | GATA3         | ENCSR000EWS                                        | ENCFF000ZKV      |
| MCF-7                 | GATA3         | ENCSR000EWS                                        | ENCFF000ZKT      |
| MCF-7                 | GATA3         | ENCSR000EWS                                        | ENCFF000ZLE      |
| MCF-7                 | GATA3         | ENCSR000BST                                        | ENCFF000QNS      |
| MCF-7                 | GATA3         | ENCSR000BST                                        | ENCFF000QNP      |
| MCF-7                 | H3K27ac       | ENCSR000EWR                                        | ENCFF000VHD      |

|       |          |             |             |
|-------|----------|-------------|-------------|
| MCF-7 | H3K27ac  | ENCSR000EWR | ENCFF000VHC |
| MCF-7 | H3K27me3 | ENCSR000EWP | ENCFF000VFU |
| MCF-7 | H3K27me3 | ENCSR000EWP | ENCFF000Vfy |
| MCF-7 | H3K27me3 | ENCSR000EWP | ENCFF000VFW |
| MCF-7 | H3K36me3 | ENCSR000EWO | ENCFF000VGE |
| MCF-7 | H3K36me3 | ENCSR000EWO | ENCFF000VGG |
| MCF-7 | H3K36me3 | ENCSR000EWO | ENCFF000VGI |
| MCF-7 | H3K4me3  | ENCSR000DWJ | ENCFF001FYK |
| MCF-7 | H3K4me3  | ENCSR000DWJ | ENCFF001FYE |
| MCF-7 | H3K9me3  | ENCSR000EWQ | ENCFF000VFG |
| MCF-7 | H3K9me3  | ENCSR000EWQ | ENCFF000VFJ |
| MCF-7 | H3K9me3  | ENCSR000EWQ | ENCFF000VFE |
| MCF-7 | HA-E2F1  | ENCSR000EWX | ENCFF000ZLD |
| MCF-7 | HA-E2F1  | ENCSR000EWX | ENCFF000ZLV |
| MCF-7 | HDAC2    | ENCSR000BTP | ENCFF000QNY |
| MCF-7 | HDAC2    | ENCSR000BTP | ENCFF000QOA |
| MCF-7 | JUND     | ENCSR000BSU | ENCFF000QOD |
| MCF-7 | JUND     | ENCSR000BSU | ENCFF000QOB |
| MCF-7 | MAX      | ENCSR000BUL | ENCFF000QON |
| MCF-7 | MAX      | ENCSR000BUL | ENCFF000QOS |
| MCF-7 | MYC      | ENCSR000DMQ | ENCFF000RZT |
| MCF-7 | MYC      | ENCSR000DMQ | ENCFF000RZV |
| MCF-7 | MYC      | ENCSR000DMP | ENCFF000RYO |
| MCF-7 | MYC      | ENCSR000DMP | ENCFF000RYP |
| MCF-7 | MYC      | ENCSR000DMM | ENCFF000RZE |
| MCF-7 | MYC      | ENCSR000DMM | ENCFF000RZC |
| MCF-7 | MYC      | ENCSR000DMJ | ENCFF000RZL |
| MCF-7 | MYC      | ENCSR000DMJ | ENCFF000RZJ |
| MCF-7 | NR2F2    | ENCSR000BUY | ENCFF000QOY |
| MCF-7 | NR2F2    | ENCSR000BUY | ENCFF000QOV |
| MCF-7 | PML      | ENCSR000BUZ | ENCFF000QPW |
| MCF-7 | PML      | ENCSR000BUZ | ENCFF000QPV |
| MCF-7 | POLR2A   | ENCSR000DMT | ENCFF000SBK |
| MCF-7 | POLR2A   | ENCSR000DMT | ENCFF000SBI |
| MCF-7 | POLR2A   | ENCSR000DMN | ENCFF000SBP |
| MCF-7 | POLR2A   | ENCSR000DMN | ENCFF000SBO |
| MCF-7 | POLR2A   | ENCSR000DMK | ENCFF000SBV |
| MCF-7 | POLR2A   | ENCSR000DMK | ENCFF000SBY |
| MCF-7 | RAD21    | ENCSR000BTQ | ENCFF000QPX |
| MCF-7 | RAD21    | ENCSR000BTQ | ENCFF000QQA |
| MCF-7 | REST     | ENCSR000BSP | ENCFF000QPH |
| MCF-7 | REST     | ENCSR000BSP | ENCFF000QPE |
| MCF-7 | SIN3A    | ENCSR000BUM | ENCFF000QQX |
| MCF-7 | SIN3A    | ENCSR000BUM | ENCFF000QQU |
| MCF-7 | SRF      | ENCSR000BVA | ENCFF000QRE |
| MCF-7 | SRF      | ENCSR000BVA | ENCFF000QRH |
| MCF-7 | TAF1     | ENCSR000AHF | ENCFF000QRS |
| MCF-7 | TAF1     | ENCSR000AHF | ENCFF000QRL |
| MCF-7 | TCF12    | ENCSR000BUN | ENCFF000QRV |
| MCF-7 | TCF12    | ENCSR000BUN | ENCFF000QRU |
| MCF-7 | TCF7L2   | ENCSR000EWT | ENCFF000ZLK |
| MCF-7 | TCF7L2   | ENCSR000EWT | ENCFF000ZLM |

|       |         |                     |             |
|-------|---------|---------------------|-------------|
| MCF-7 | TEAD4   | ENCSR000BUO         | ENCFF000QSI |
| MCF-7 | TEAD4   | ENCSR000BUO         | ENCFF000QSB |
| MCF-7 | ZNF217  | ENCSR000EWU         | ENCFF000ZLW |
| MCF-7 | ZNF217  | ENCSR000EWU         | ENCFF000ZLT |
| MCF-7 | FOXA1   | SRP044607/SRX747793 | SRR1635461  |
| MCF-7 | FOXA1   | SRP044607/SRX747794 | SRR1635462  |
| MCF-7 | Control | SRP044607           | SRR1635437  |
| MCF-7 | Control | SRP044607           | SRR1635438  |
| MCF-7 | H3K4me1 | SRX153145           | SRR507786   |
| MCF-7 | H3K4me1 | SRX153146           | SRR507787   |
| MCF-7 | H3K4me1 | SRX153147           | SRR507788   |



**Supplementary Table S2 - List of ChIP-Seq datasets used in the study (HEPG2 cells)**

| Biosample_name | Target  | Experiment                                         | Accession   |
|----------------|---------|----------------------------------------------------|-------------|
| HEPG2          | Control | Data will be provided through GEO upon publication |             |
| HEPG2          | NIPBL   | Data will be provided through GEO upon publication |             |
| HEPG2          | MED1    | Data will be provided through GEO upon publication |             |
| HEPG2          | SMC1A   | Data will be provided through GEO upon publication |             |
| HepG2          | ARID3A  | ENCSR000EDP                                        | ENCFF000XOU |
| HepG2          | ARID3A  | ENCSR000EDP                                        | ENCFF000XOS |
| HepG2          | ATF3    | ENCSR000BKE                                        | ENCFF000PFR |
| HepG2          | ATF3    | ENCSR000BKE                                        | ENCFF000PFQ |
| HepG2          | BHLHE40 | ENCSR000EDT                                        | ENCFF000XPC |
| HepG2          | BHLHE40 | ENCSR000EDT                                        | ENCFF000XPA |
| HepG2          | BHLHE40 | ENCSR000BID                                        | ENCFF000PFY |
| HepG2          | BHLHE40 | ENCSR000BID                                        | ENCFF000PGB |
| HepG2          | BRCA1   | ENCSR000EDY                                        | ENCFF000XPS |
| HepG2          | BRCA1   | ENCSR000EDY                                        | ENCFF000XPL |
| HepG2          | CEBPB   | ENCSR000EEX                                        | ENCFF000XPT |
| HepG2          | CEBPB   | ENCSR000EEX                                        | ENCFF000XPR |
| HepG2          | CEBPB   | ENCSR000EEE                                        | ENCFF000XQN |
| HepG2          | CEBPB   | ENCSR000EEE                                        | ENCFF000XQM |
| HepG2          | CEBPB   | ENCSR000BQI                                        | ENCFF000PGI |
| HepG2          | CEBPB   | ENCSR000BQI                                        | ENCFF000PGG |
| HepG2          | CEBPD   | ENCSR000BQJ                                        | ENCFF000PGK |
| HepG2          | CEBPD   | ENCSR000BQJ                                        | ENCFF000PGQ |
| HepG2          | CEBPZ   | ENCSR000EDO                                        | ENCFF000XPZ |
| HepG2          | CEBPZ   | ENCSR000EDO                                        | ENCFF000XQB |
| HepG2          | CHD2    | ENCSR000EED                                        | ENCFF000XQQ |
| HepG2          | CHD2    | ENCSR000EED                                        | ENCFF000XQP |
| HepG2          | Control | ENCSR000DUC                                        | ENCFF001HOD |
| HepG2          | Control | ENCSR000EES                                        | ENCFF000XQR |
| HepG2          | Control | ENCSR000EES                                        | ENCFF000XQS |
| HepG2          | Control | ENCSR000EER                                        | ENCFF000XRI |
| HepG2          | Control | ENCSR000EER                                        | ENCFF000XRH |
| HepG2          | Control | ENCSR000EVT                                        | ENCFF000XTE |
| HepG2          | Control | ENCSR000AME                                        | ENCFF000BDZ |
| HepG2          | Control | ENCSR000AME                                        | ENCFF000BDT |
| HepG2          | Control | ENCSR000DLT                                        | ENCFF000RUP |
| HepG2          | Control | ENCSR000EZR                                        | ENCFF000XTB |
| HepG2          | Control | ENCSR000EZR                                        | ENCFF000XSV |
| HepG2          | Control | ENCSR000EZR                                        | ENCFF000XSY |
| HepG2          | Control | ENCSR000BLN                                        | ENCFF000POH |
| HepG2          | Control | ENCSR000BLN                                        | ENCFF000POC |
| HepG2          | Control | ENCSR000BPH                                        | ENCFF000PPI |
| HepG2          | Control | ENCSR000BPH                                        | ENCFF000PPF |
| HepG2          | Control | ENCSR000BPH                                        | ENCFF000PPC |
| HepG2          | Control | ENCSR000BLH                                        | ENCFF000POO |
| HepG2          | Control | ENCSR000BLH                                        | ENCFF000POQ |
| HepG2          | Control | ENCSR000BLG                                        | ENCFF000POU |
| HepG2          | Control | ENCSR000BLG                                        | ENCFF000POV |
| HepG2          | CREB1   | ENCSR000BVL                                        | ENCFF000PGX |
| HepG2          | CREB1   | ENCSR000BVL                                        | ENCFF000PGZ |
| HepG2          | CTCF    | ENCSR000DUG                                        | ENCFF001HNU |
| HepG2          | CTCF    | ENCSR000DUG                                        | ENCFF001HNT |
| HepG2          | CTCF    | ENCSR000AMA                                        | ENCFF000BEI |
| HepG2          | CTCF    | ENCSR000AMA                                        | ENCFF000BED |
| HepG2          | CTCF    | ENCSR000BIE                                        | ENCFF000PHG |

|       |                  |             |             |
|-------|------------------|-------------|-------------|
| HepG2 | CTCF             | ENCSR000BIE | ENCFF000PHE |
| HepG2 | CTCF             | ENCSR000DLS | ENCFF000RUI |
| HepG2 | CTCF             | ENCSR000DLS | ENCFF000RUJ |
| HepG2 | ELF1             | ENCSR000BMZ | ENCFF000PHP |
| HepG2 | ELF1             | ENCSR000BMZ | ENCFF000PHM |
| HepG2 | EP300            | ENCSR000EDV | ENCFF000XVS |
| HepG2 | EP300            | ENCSR000EDV | ENCFF000XVT |
| HepG2 | EP300            | ENCSR000BLW | ENCFF000PMZ |
| HepG2 | EP300            | ENCSR000BLW | ENCFF000PNA |
| HepG2 | ESRRA            | ENCSR000EEW | ENCFF000XRN |
| HepG2 | ESRRA            | ENCSR000EEW | ENCFF000XRO |
| HepG2 | EZH2             | ENCSR000ARI | ENCFF000BEL |
| HepG2 | EZH2             | ENCSR000ARI | ENCFF000BEQ |
| HepG2 | FOSL2            | ENCSR000BHP | ENCFF000PHU |
| HepG2 | FOSL2            | ENCSR000BHP | ENCFF000PIE |
| HepG2 | FOXA1            | ENCSR000BMO | ENCFF000PIB |
| HepG2 | FOXA1            | ENCSR000BMO | ENCFF000PHY |
| HepG2 | FOXA1            | ENCSR000BLE | ENCFF000PIM |
| HepG2 | FOXA1            | ENCSR000BLE | ENCFF000PIJ |
| HepG2 | FOXA2            | ENCSR000BNI | ENCFF000PIX |
| HepG2 | FOXA2            | ENCSR000BNI | ENCFF000PIT |
| HepG2 | GABPA            | ENCSR000BJK | ENCFF000PJF |
| HepG2 | GABPA            | ENCSR000BJK | ENCFF000PJC |
| HepG2 | goat-IgG-control | ENCSR000EDR | ENCFF000XSE |
| HepG2 | goat-IgG-control | ENCSR000EDR | ENCFF000XSG |
| HepG2 | H2AFZ            | ENCSR000AOK | ENCFF000BEP |
| HepG2 | H2AFZ            | ENCSR000AOK | ENCFF000BES |
| HepG2 | H3K27ac          | ENCSR000AMO | ENCFF000BFD |
| HepG2 | H3K27ac          | ENCSR000AMO | ENCFF000BFH |
| HepG2 | H3K27me3         | ENCSR000DUE | ENCFF001FLT |
| HepG2 | H3K27me3         | ENCSR000DUE | ENCFF001FLQ |
| HepG2 | H3K27me3         | ENCSR000AOL | ENCFF000BFR |
| HepG2 | H3K27me3         | ENCSR000AOL | ENCFF000BFU |
| HepG2 | H3K36me3         | ENCSR000DUD | ENCFF001FMA |
| HepG2 | H3K36me3         | ENCSR000DUD | ENCFF001FMC |
| HepG2 | H3K36me3         | ENCSR000AMB | ENCFF000BFZ |
| HepG2 | H3K36me3         | ENCSR000AMB | ENCFF000BFT |
| HepG2 | H3K4me1          | ENCSR000APV | ENCFF000BEY |
| HepG2 | H3K4me1          | ENCSR000APV | ENCFF000BEX |
| HepG2 | H3K4me2          | ENCSR000AMC | ENCFF000BGD |
| HepG2 | H3K4me2          | ENCSR000AMC | ENCFF000BGA |
| HepG2 | H3K4me3          | ENCSR000DUF | ENCFF001FMH |
| HepG2 | H3K4me3          | ENCSR000DUF | ENCFF001FMG |
| HepG2 | H3K4me3          | ENCSR000AMP | ENCFF000BGF |
| HepG2 | H3K4me3          | ENCSR000AMP | ENCFF000BGE |
| HepG2 | H3K79me2         | ENCSR000AOM | ENCFF000BGR |
| HepG2 | H3K79me2         | ENCSR000AOM | ENCFF000BGW |
| HepG2 | H3K9ac           | ENCSR000AMD | ENCFF000BGQ |
| HepG2 | H3K9ac           | ENCSR000AMD | ENCFF000BGS |
| HepG2 | H3K9me3          | ENCSR000ATD | ENCFF000BFK |
| HepG2 | H3K9me3          | ENCSR000ATD | ENCFF000BFI |
| HepG2 | H4K20me1         | ENCSR000AMQ | ENCFF000BGX |
| HepG2 | H4K20me1         | ENCSR000AMQ | ENCFF000BHC |
| HepG2 | HDAC2            | ENCSR000BMC | ENCFF000PJJ |
| HepG2 | HDAC2            | ENCSR000BMC | ENCFF000PJD |
| HepG2 | HNF4A            | ENCSR000EEU | ENCFF000XRT |
| HepG2 | HNF4A            | ENCSR000EEU | ENCFF000XSM |

|       |        |             |             |
|-------|--------|-------------|-------------|
| HepG2 | HNF4A  | ENCSR000BLF | ENCFF000PJT |
| HepG2 | HNF4A  | ENCSR000BLF | ENCFF000PJX |
| HepG2 | HNF4G  | ENCSR000BNJ | ENCFF000PKH |
| HepG2 | HNF4G  | ENCSR000BNJ | ENCFF000PKJ |
| HepG2 | HSF1   | ENCSR000EET | ENCFF000XSL |
| HepG2 | HSF1   | ENCSR000EET | ENCFF000XSK |
| HepG2 | IRF3   | ENCSR000EEJ | ENCFF000XTN |
| HepG2 | IRF3   | ENCSR000EEJ | ENCFF000XTO |
| HepG2 | JUN    | ENCSR000EEK | ENCFF000XQU |
| HepG2 | JUN    | ENCSR000EEK | ENCFF000XQT |
| HepG2 | JUND   | ENCSR000EEI | ENCFF000XTR |
| HepG2 | JUND   | ENCSR000EEI | ENCFF000XTQ |
| HepG2 | JUND   | ENCSR000BGK | ENCFF000PKR |
| HepG2 | JUND   | ENCSR000BGK | ENCFF000PKK |
| HepG2 | MAFF   | ENCSR000EEC | ENCFF000XTZ |
| HepG2 | MAFF   | ENCSR000EEC | ENCFF000XUA |
| HepG2 | MAFK   | ENCSR000EEB | ENCFF000XUK |
| HepG2 | MAFK   | ENCSR000EEB | ENCFF000XUL |
| HepG2 | MAFK   | ENCSR000EDZ | ENCFF000XUU |
| HepG2 | MAFK   | ENCSR000EDZ | ENCFF000XVK |
| HepG2 | MAX    | ENCSR000EDS | ENCFF000XUH |
| HepG2 | MAX    | ENCSR000EDS | ENCFF000XUF |
| HepG2 | MAX    | ENCSR000BTM | ENCFF000PKZ |
| HepG2 | MAX    | ENCSR000BTM | ENCFF000PKX |
| HepG2 | MAZ    | ENCSR000EDN | ENCFF000XUP |
| HepG2 | MAZ    | ENCSR000EDN | ENCFF000XUN |
| HepG2 | MBD4   | ENCSR000BQW | ENCFF000PLF |
| HepG2 | MBD4   | ENCSR000BQW | ENCFF000PLH |
| HepG2 | MXI1   | ENCSR000EDU | ENCFF000XVA |
| HepG2 | MXI1   | ENCSR000EDU | ENCFF000XUX |
| HepG2 | MXI1   | ENCSR000EDU | ENCFF000XVC |
| HepG2 | MYBL2  | ENCSR000BRO | ENCFF000PLP |
| HepG2 | MYBL2  | ENCSR000BRO | ENCFF000PLM |
| HepG2 | MYC    | ENCSR000DLR | ENCFF000RTV |
| HepG2 | MYC    | ENCSR000DLR | ENCFF000RTX |
| HepG2 | MYC    | ENCSR000DLR | ENCFF000RTY |
| HepG2 | NFIC   | ENCSR000BQX | ENCFF000PMB |
| HepG2 | NFIC   | ENCSR000BQX | ENCFF000PLW |
| HepG2 | NR2C2  | ENCSR000EVS | ENCFF000XZK |
| HepG2 | NR2C2  | ENCSR000EVS | ENCFF000XZJ |
| HepG2 | NR2F2  | ENCSR000BVM | ENCFF000PMC |
| HepG2 | NR2F2  | ENCSR000BVM | ENCFF000PMF |
| HepG2 | NR3C1  | ENCSR000EEV | ENCFF000XRV |
| HepG2 | NR3C1  | ENCSR000EEV | ENCFF000XRU |
| HepG2 | NRF1   | ENCSR000EEH | ENCFF000XVP |
| HepG2 | NRF1   | ENCSR000EEH | ENCFF000XVR |
| HepG2 | POLR2A | ENCSR000EEM | ENCFF000XWJ |
| HepG2 | POLR2A | ENCSR000EEM | ENCFF000XWR |
| HepG2 | POLR2A | ENCSR000EEP | ENCFF000XWF |
| HepG2 | POLR2A | ENCSR000EEP | ENCFF000XWI |
| HepG2 | POLR2A | ENCSR000EZQ | ENCFF000XWW |
| HepG2 | POLR2A | ENCSR000EZQ | ENCFF000XWT |
| HepG2 | POLR2A | ENCSR000EZQ | ENCFF000XWV |
| HepG2 | POLR2A | ENCSR000DLQ | ENCFF000RUT |
| HepG2 | POLR2A | ENCSR000DLQ | ENCFF000RUR |
| HepG2 | POLR2A | ENCSR000DLQ | ENCFF000RUY |
| HepG2 | POLR2A | ENCSR000BJM | ENCFF000PNT |

|       |                    |             |             |
|-------|--------------------|-------------|-------------|
| HepG2 | POLR2A             | ENCSR000BJM | ENCFF000PNM |
| HepG2 | POLR2AphosphoS2    | ENCSR000EDX | ENCFF000XXB |
| HepG2 | POLR2AphosphoS2    | ENCSR000EDX | ENCFF000XXC |
| HepG2 | POLR2AphosphoS5    | ENCSR000BPI | ENCFF000PNI |
| HepG2 | POLR2AphosphoS5    | ENCSR000BPI | ENCFF000PNL |
| HepG2 | PPARGC1A           | ENCSR000EEQ | ENCFF000XVQ |
| HepG2 | PPARGC1A           | ENCSR000EEQ | ENCFF000XWG |
| HepG2 | rabbit-IgG-control | ENCSR000EEN | ENCFF000XTF |
| HepG2 | RAD21              | ENCSR000EEG | ENCFF000XXK |
| HepG2 | RAD21              | ENCSR000EEG | ENCFF000XXL |
| HepG2 | RAD21              | ENCSR000BLS | ENCFF000PNY |
| HepG2 | RAD21              | ENCSR000BLS | ENCFF000PNW |
| HepG2 | RCOR1              | ENCSR000EDQ | ENCFF000XQY |
| HepG2 | RCOR1              | ENCSR000EDQ | ENCFF000XQW |
| HepG2 | REST               | ENCSR000BJL | ENCFF000PMN |
| HepG2 | REST               | ENCSR000BJL | ENCFF000PMK |
| HepG2 | REST               | ENCSR000BOT | ENCFF000PMU |
| HepG2 | REST               | ENCSR000BOT | ENCFF000PMV |
| HepG2 | RFX5               | ENCSR000EEA | ENCFF000XXZ |
| HepG2 | RFX5               | ENCSR000EEA | ENCFF000XXX |
| HepG2 | RXRA               | ENCSR000BHU | ENCFF000PPQ |
| HepG2 | RXRA               | ENCSR000BHU | ENCFF000PPM |
| HepG2 | SIN3A              | ENCSR000BGL | ENCFF000PPW |
| HepG2 | SIN3A              | ENCSR000BGL | ENCFF000PQC |
| HepG2 | SMC3               | ENCSR000EDW | ENCFF000XXY |
| HepG2 | SMC3               | ENCSR000EDW | ENCFF000XYC |
| HepG2 | SP1                | ENCSR000BJX | ENCFF000PQJ |
| HepG2 | SP1                | ENCSR000BJX | ENCFF000PQE |
| HepG2 | SP2                | ENCSR000BOU | ENCFF000PQL |
| HepG2 | SP2                | ENCSR000BOU | ENCFF000PQP |
| HepG2 | SREBF1             | ENCSR000EEO | ENCFF000XYE |
| HepG2 | SREBF1             | ENCSR000EEO | ENCFF000XYA |
| HepG2 | SREBF1             | ENCSR000EEO | ENCFF000XYB |
| HepG2 | SREBF1             | ENCSR000EZP | ENCFF000XYK |
| HepG2 | SREBF1             | ENCSR000EZP | ENCFF000XYD |
| HepG2 | SREBF1             | ENCSR000EZP | ENCFF000XYL |
| HepG2 | SREBF2             | ENCSR000EZO | ENCFF000XYM |
| HepG2 | SREBF2             | ENCSR000EZO | ENCFF000XYN |
| HepG2 | SREBF2             | ENCSR000EZO | ENCFF000XYS |
| HepG2 | SRF                | ENCSR000BLV | ENCFF000PQW |
| HepG2 | SRF                | ENCSR000BLV | ENCFF000PQU |
| HepG2 | TAF1               | ENCSR000BJN | ENCFF000PRD |
| HepG2 | TAF1               | ENCSR000BJN | ENCFF000PRB |
| HepG2 | TBP                | ENCSR000EEL | ENCFF000XZI |
| HepG2 | TBP                | ENCSR000EEL | ENCFF000XZL |
| HepG2 | TCF12              | ENCSR000BJG | ENCFF000PRJ |
| HepG2 | TCF12              | ENCSR000BJG | ENCFF000PRL |
| HepG2 | TCF7L2             | ENCSR000EVQ | ENCFF000XYX |
| HepG2 | TCF7L2             | ENCSR000EVQ | ENCFF000XYV |
| HepG2 | TEAD4              | ENCSR000BRP | ENCFF000PRQ |
| HepG2 | TEAD4              | ENCSR000BRP | ENCFF000PRU |
| HepG2 | USF1               | ENCSR000BGM | ENCFF000PSH |
| HepG2 | USF1               | ENCSR000BGM | ENCFF000PSA |
| HepG2 | USF2               | ENCSR000EEF | ENCFF000XZT |
| HepG2 | USF2               | ENCSR000EEF | ENCFF000XZV |
| HepG2 | YY1                | ENCSR000BNT | ENCFF000PSE |
| HepG2 | YY1                | ENCSR000BNT | ENCFF000PSD |

|       |        |             |              |
|-------|--------|-------------|--------------|
| HepG2 | ZBTB33 | ENCSR000BNA | ENCSFF000PSY |
| HepG2 | ZBTB33 | ENCSR000BNA | ENCSFF000PST |
| HepG2 | ZBTB33 | ENCSR000BHR | ENCSFF000PSP |
| HepG2 | ZBTB33 | ENCSR000BHR | ENCSFF000PSW |
| HepG2 | ZBTB7A | ENCSR000BQA | ENCSFF000PTI |
| HepG2 | ZBTB7A | ENCSR000BQA | ENCSFF000PTF |
| HepG2 | ZEB1   | ENCSR000BVN | ENCSFF000PTQ |
| HepG2 | ZEB1   | ENCSR000BVN | ENCSFF000PTO |
| HepG2 | ZNF274 | ENCSR000EVR | ENCSFF000XZW |
| HepG2 | ZNF274 | ENCSR000EVR | ENCSFF000XZX |

**Supplementary Table S2 - List of ChIP-Seq datasets used in the study (A549 cells)**

| Biosample_name | Target  | Experiment                                         | Accession   |
|----------------|---------|----------------------------------------------------|-------------|
| A549           | Control | Data will be provided through GEO upon publication |             |
| A549           | NIPBL   | Data will be provided through GEO upon publication |             |
| A549           | MED1    | Data will be provided through GEO upon publication |             |
| A549           | SMC1A   | Data will be provided through GEO upon publication |             |
| A549           | ATF3    | ENCSR000BPS                                        | ENCFF000MWR |
| A549           | ATF3    | ENCSR000BPS                                        | ENCFF000MWV |
| A549           | BCL3    | ENCSR000BQH                                        | ENCFF000MXC |
| A549           | BCL3    | ENCSR000BQH                                        | ENCFF000MXD |
| A549           | BHLHE40 | ENCSR000DYJ                                        | ENCFF000VOD |
| A549           | CEBPB   | ENCSR000DYI                                        | ENCFF000VOL |
| A549           | CEBPB   | ENCSR000DYI                                        | ENCFF000VON |
| A549           | CEBPB   | ENCSR000BUB                                        | ENCFF000MXK |
| A549           | CEBPB   | ENCSR000BUB                                        | ENCFF000MXH |
| A549           | Control | ENCSR000DPE                                        | ENCFF001GWE |
| A549           | Control | ENCSR000DNB                                        | ENCFF000RMI |
| A549           | Control | ENCSR000BVQ                                        | ENCFF000NGN |
| A549           | Control | ENCSR000BVQ                                        | ENCFF000NGK |
| A549           | Control | ENCSR000BVQ                                        | ENCFF000NGM |
| A549           | Control | ENCSR000BPN                                        | ENCFF000NGB |
| A549           | Control | ENCSR000BPD                                        | ENCFF000NGH |
| A549           | Control | ENCSR000BNC                                        | ENCFF000NFR |
| A549           | Control | ENCSR000BKZ                                        | ENCFF000NGC |
| A549           | Control | ENCSR000ASS                                        | ENCFF000AHV |
| A549           | Control | ENCSR000ASS                                        | ENCFF000AHM |
| A549           | CREB1   | ENCSR000BRC                                        | ENCFF000MXT |
| A549           | CREB1   | ENCSR000BRA                                        | ENCFF000MXO |
| A549           | CTCF    | ENCSR000DYD                                        | ENCFF000VPF |
| A549           | CTCF    | ENCSR000DYD                                        | ENCFF000VPD |
| A549           | CTCF    | ENCSR000DPF                                        | ENCFF001GVU |
| A549           | CTCF    | ENCSR000DPF                                        | ENCFF001GWB |
| A549           | CTCF    | ENCSR000DNA                                        | ENCFF000RMB |
| A549           | CTCF    | ENCSR000DNA                                        | ENCFF000RMC |
| A549           | CTCF    | ENCSR000BHW                                        | ENCFF000MYJ |
| A549           | CTCF    | ENCSR000BHW                                        | ENCFF000MYN |
| A549           | CTCF    | ENCSR000AUF                                        | ENCFF000AHW |
| A549           | CTCF    | ENCSR000AUF                                        | ENCFF000AHX |
| A549           | E2F6    | ENCSR000BTC                                        | ENCFF000MYY |
| A549           | E2F6    | ENCSR000BTC                                        | ENCFF000MYX |
| A549           | ELF1    | ENCSR000BPT                                        | ENCFF000MZF |
| A549           | ELF1    | ENCSR000BPT                                        | ENCFF000MZG |
| A549           | EP300   | ENCSR000BPW                                        | ENCFF000NEG |
| A549           | EP300   | ENCSR000BPW                                        | ENCFF000NEI |
| A549           | ETS1    | ENCSR000BPU                                        | ENCFF000MZO |
| A549           | ETS1    | ENCSR000BPU                                        | ENCFF000MZH |
| A549           | FOSL2   | ENCSR000BQO                                        | ENCFF000MZW |
| A549           | FOSL2   | ENCSR000BQO                                        | ENCFF000MZT |
| A549           | FOXA1   | ENCSR000BRD                                        | ENCFF000NAI |
| A549           | FOXA1   | ENCSR000BRD                                        | ENCFF000NAH |
| A549           | FOXA2   | ENCSR000BRE                                        | ENCFF000NAQ |
| A549           | FOXA2   | ENCSR000BRE                                        | ENCFF000NAU |
| A549           | GABPA   | ENCSR000BPY                                        | ENCFF000NAY |
| A549           | GABPA   | ENCSR000BPY                                        | ENCFF000NBA |
| A549           | GATA3   | ENCSR000BTI                                        | ENCFF000NBH |
| A549           | GATA3   | ENCSR000BTI                                        | ENCFF000NBM |
| A549           | H2AFZ   | ENCSR000AUH                                        | ENCFF000AIK |

|      |                    |             |             |
|------|--------------------|-------------|-------------|
| A549 | H2AFZ              | ENCSR000AUH | ENCFF000AIJ |
| A549 | H3K27ac            | ENCSR000AUI | ENCFF000AKS |
| A549 | H3K27ac            | ENCSR000AUI | ENCFF000AKR |
| A549 | H3K27me3           | ENCSR000AUK | ENCFF000ALD |
| A549 | H3K27me3           | ENCSR000AUK | ENCFF000ALK |
| A549 | H3K36me3           | ENCSR000AUL | ENCFF000ALU |
| A549 | H3K36me3           | ENCSR000AUL | ENCFF000ALQ |
| A549 | H3K4me1            | ENCSR000AUM | ENCFF000AJC |
| A549 | H3K4me1            | ENCSR000AUM | ENCFF000AIW |
| A549 | H3K4me2            | ENCSR000AVI | ENCFF000AJI |
| A549 | H3K4me2            | ENCSR000AVI | ENCFF000AJH |
| A549 | H3K4me3            | ENCSR000DPD | ENCFF001EMB |
| A549 | H3K4me3            | ENCSR000DPD | ENCFF001EMC |
| A549 | H3K4me3            | ENCSR000ASH | ENCFF000AJT |
| A549 | H3K4me3            | ENCSR000ASH | ENCFF000AJX |
| A549 | H3K79me2           | ENCSR000ATP | ENCFF000AMB |
| A549 | H3K79me2           | ENCSR000ATP | ENCFF000AMD |
| A549 | H3K9ac             | ENCSR000ASV | ENCFF000AJY |
| A549 | H3K9ac             | ENCSR000ASV | ENCFF000AJZ |
| A549 | H3K9me3            | ENCSR000AUN | ENCFF000AKK |
| A549 | H3K9me3            | ENCSR000AUN | ENCFF000AKG |
| A549 | H4K20me1           | ENCSR000AUO | ENCFF000AMF |
| A549 | H4K20me1           | ENCSR000AUO | ENCFF000AME |
| A549 | JUND               | ENCSR000BRF | ENCFF000NDF |
| A549 | JUND               | ENCSR000BRF | ENCFF000NDH |
| A549 | MAX                | ENCSR000DYG | ENCFF000VPS |
| A549 | MAX                | ENCSR000DYG | ENCFF000VPU |
| A549 | MAX                | ENCSR000BTJ | ENCFF000NDP |
| A549 | MAX                | ENCSR000BTJ | ENCFF000NDT |
| A549 | MYC                | ENCSR000DYC | ENCFF000VOW |
| A549 | MYC                | ENCSR000DYC | ENCFF000VOU |
| A549 | NR3C1              | ENCSR000BJT | ENCFF000NDD |
| A549 | NR3C1              | ENCSR000BJT | ENCFF000NDA |
| A549 | NR3C1              | ENCSR000BIO | ENCFF000NCL |
| A549 | NR3C1              | ENCSR000BIO | ENCFF000NCO |
| A549 | PBX3               | ENCSR000BTN | ENCFF000NEY |
| A549 | PBX3               | ENCSR000BTN | ENCFF000NEP |
| A549 | POLR2A             | ENCSR000DMZ | ENCFF000RMM |
| A549 | POLR2A             | ENCSR000DMZ | ENCFF000RMO |
| A549 | POLR2A             | ENCSR000BHH | ENCFF000NEZ |
| A549 | POLR2A             | ENCSR000BHH | ENCFF000NFG |
| A549 | POLR2AphosphoS2    | ENCSR000DYF | ENCFF000VPZ |
| A549 | POLR2AphosphoS2    | ENCSR000DYF | ENCFF000VQB |
| A549 | rabbit-IgG-control | ENCSR496AXR | ENCFF000VPI |
| A549 | rabbit-IgG-control | ENCSR496AXR | ENCFF000VPK |
| A549 | RAD21              | ENCSR000DYE | ENCFF000VQI |
| A549 | RAD21              | ENCSR000DYE | ENCFF000VQK |
| A549 | RAD21              | ENCSR000BUC | ENCFF000NFN |
| A549 | RAD21              | ENCSR000BUC | ENCFF000NFL |
| A549 | REST               | ENCSR000BQP | ENCFF000NDY |
| A549 | REST               | ENCSR000BQP | ENCFF000NDV |
| A549 | SIN3A              | ENCSR000BRM | ENCFF000NGY |
| A549 | SIN3A              | ENCSR000BRM | ENCFF000NHA |
| A549 | SIX5               | ENCSR000BRL | ENCFF000NHG |
| A549 | SIX5               | ENCSR000BRL | ENCFF000NHI |
| A549 | SP1                | ENCSR000BPE | ENCFF000NHM |
| A549 | SP1                | ENCSR000BPE | ENCFF000NHP |
| A549 | TAF1               | ENCSR000BPF | ENCFF000NHV |

|      |        |             |             |
|------|--------|-------------|-------------|
| A549 | TAF1   | ENCSR000BPF | ENCFF000NHY |
| A549 | TCF12  | ENCSR000BQQ | ENCFF000NIG |
| A549 | TCF12  | ENCSR000BQQ | ENCFF000NID |
| A549 | TEAD4  | ENCSR000BUD | ENCFF000NIP |
| A549 | TEAD4  | ENCSR000BUD | ENCFF000NIM |
| A549 | USF1   | ENCSR000BPV | ENCFF000NJL |
| A549 | USF1   | ENCSR000BPV | ENCFF000NJM |
| A549 | USF1   | ENCSR000BJB | ENCFF000NJA |
| A549 | USF1   | ENCSR000BJB | ENCFF000NJE |
| A549 | YY1    | ENCSR000BPM | ENCFF000NJU |
| A549 | YY1    | ENCSR000BPM | ENCFF000NJS |
| A549 | ZBTB33 | ENCSR000BPZ | ENCFF000NKG |
| A549 | ZBTB33 | ENCSR000BPZ | ENCFF000NKB |



**Supplementary Table S3 - List of shRNA plasmids and sequences used in the study**

| <b>Targets</b> | <b>Reference Numbers</b>                | <b>shRNA sequences</b>                                      |
|----------------|-----------------------------------------|-------------------------------------------------------------|
| shCTRL-1       | Addgene (#1864)                         | CCTAAGGTTAAGTCGCCCTCGCTCGAGCGAGGGCGACTTAACCTTAGG            |
| shCTRL-2       | SHC002 (Sigma)                          | CCGGCAACAAGATGAAGAGCACCAACTCGAGTTGGTGCTCTTCATCTTGTGTTTT     |
| shMED1-1       | RCN0000019799 (TRC1.5 library - Sigma)  | CCGGGCAGTAAATCAGAAGGTTTCATCTCGAGATGAACCTTCGATTTACTGCTTTTT   |
| shMED1-2       | TRCN0000019800 (TRC1.5 library - Sigma) | CCGGGCCGAGTTCCTCTTATCCTAACTCGAGTTAGGATAAGAGGAACCTGGCTTTTT   |
| shNIPBL-1      | RCN0000146423 (TRC1.5 library - Sigma)  | CCGGCGGATGCTTGTCTTACAACACTCGAGTAGTTGTAAGACAAGCATCCGTTTTTTG  |
| shNIPBL-2      | TRCN0000148381 (TRC1.5 library - Sigma) | CCGGCTCAGGATTCAGACTCCATAACTCGAGTTATGGAGTCTGAATCCTGAGTTTTTG  |
| shSMC1A-1      | TRCN0000062554 (TRC1.5 library - Sigma) | CCGGCGACAGATTATCGGACCATTTCTCGAGAAATGGTCCGATAATCTGTCGTTTTTG  |
| shSMC1A-2      | TRCN0000062555 (TRC1.5 library - Sigma) | CCGGGCCGGGACTGTATTCACTGATACTCGAGTATACTGAATACAGTCCCGGCTTTTTG |
| shESR1-1       | TRCN0000003299 (TRC1.5 library - Sigma) | CCGGAGCACCCCTGAAGTCTCTGAACTCGAGTTCAGAGACTTCAGGGTGCTTTTTT    |
| shESR1-2       | TRCN0000003301 (TRC1.5 library - Sigma) | CCGGCTCTACTTCATCGCATTCTTCTCGAGAAGGAATGCGATGAAGTAGAGTTTTT    |
| shHNF4A-1      | TRCN0000019189 (TRC1.5 library - Sigma) | CCGGCCACATGTACTCCTGCAGATTCTCGAGAATCTGCAGGAGTACATGTGGTTTTT   |
| shHNF4A-2      | TRCN0000019190 (TRC1.5 library - Sigma) | CCGGGCAGGAACATATGGGAACCAACTCGAGTTGGTTCCCATATGTTCTGCTTTTT    |
| shFOSL2-1      | TRCN0000329767 (TRC1.5 library - Sigma) | CCGGCACGGCCCAAGTGTGCAAGATTCTCGAGAATCTTGCACACTGGGCCGTTTTTTG  |
| shFOSL2-2      | TRCN0000329710 (TRC1.5 library - Sigma) | CCGGGCAGTGAGTATTGGAAGACTTCTCGAGAAGTCTTCCAATACTCACTGCTTTTTG  |
| shFOXA1-1      | TRCN0000014878 (TRC1.5 library - Sigma) | CCGGGCGAAGTTAATGATCCACAACACTCGAGTTGTGGATCATTAACTTCGCTTTTT   |
| shFOXA1-2      | TRCN0000014879 (TRC1.5 library - Sigma) | CCGGGCGTACTACCAAGGTGTGTATCTCGAGATACACACCTTGGTAGTACGCTTTTT   |
| shFOXA2-1      | TRCN0000014915 (TRC1.5 library - Sigma) | CCGGGAACGGCATGAACACGTACATCTCGAGATGTACGTGTTTCATGCCGTTCTTTTT  |
| shFOXA2-2      | TRCN0000014916 (TRC1.5 library - Sigma) | CCGGCTACGCCAACATGAACCTCATCTCGAGATGGAGTTCATGTTGGCGTAGTTTTT   |
